# Supplementary material for: Experimental investigation and modeling of the kinetics of CCl4 pyrolysis behind reflected shock waves using high-repetition-rate time-of-flight mass spectrometry
Source: Royal Society of Chemistry journal article supplement (doi:10.1039/c2cp42574b), 2013-01-01
Supplement: c2cp42574b.dat [file c2cp42574b.dat]

!****************************************************************************

!Mechanismus for CCl4 H. Boehm, 15/06/2012

!k= A Tn exp (-Ea/RT)           A: cm3 mole-1 s-1       Ea: cal

!    A         n               Ea                       Ref.

! Units: cm3, s^-1, mol, cal

! Cl2 + M => 2 Cl + M /Baulch

!****************************************************************************

ELEMENTS

C Cl AR NE 

END

SPECIES

CCl4       CCl3       C2Cl2        C2Cl4        Cl2         AR   

CCl2       CCl        C2Cl6        C2Cl5        C2Cl3

C2Cl       Cl

C4Cl2      C6Cl2      C8Cl2        C10Cl2       C12Cl2 

C4Cl6      C4Cl5      C4Cl4        C4Cl3        C6Cl5       C6Cl6

C1

C2         C3         C4           C5

C6         C7         C8           C9

C10        C11        C12          C13

C14        C15        C16          C17

C18        C19        C20          C21

C22        C23        C24          C25

C26        C27        C28          C29

C30        C31        C32          C33

C34        C35        C36          C37

C38        C39        C40          C41

C42        C43        C44          C45

C46        C47        C48          C49

C50        C51        C52          C53

C54        C55        C56          C57

C58        C59        C60          C61

C62        C63        C64          C65

C66        C67        C68          C69

C70        C71        C72          C73

C74        C75        C76          C77

C78        C79        C80          C81

C82        C83        

S84    

NE

END

REACTIONS

!****************************************************************************

! Gas phase reactions

!****************************************************************************

CCl4 = CCl3 + Cl                         2.60E+16   0.0    6.83E+04!Won 

CCl4 + Cl = CCl3 + 2Cl                   5.75E+13   0.0    1.57E+04!Kovacs

CCl4 + C1 = CCl3 + CCl                   9.04E+12   0.0    0.0     !Kovacs

CCl2 + Cl = CCl3                         1.58E+13   0.0    0.0     !Won1

CCl3 + Cl = CCl2 + Cl2                   1.00E+14   0.0    0.0     !Zhiltsova

CCl2 + M  = CCl + Cl + M                 4.40E+15   0.0    6.76E+04!Kumaran

CCl2 + CCl2 = C2Cl2 + 2Cl                5.40E+14   0.0    1.52E+04!Kumaran

CCl + M  = C1 + Cl + M                   4.32E+15   0.0    6.93E+04!Kovacs

2CCl = C2 + Cl + Cl                      2.20E+13   0.0    0.0     !Kumaran

CCl + Cl = C1 + Cl2                      8.49E+13   0.0    2.46E+04!Garrett

2Cl + M  => Cl2 + M                      2.23E+14   0.0   -1.81E+03!Baulch

Cl2 + M  => 2Cl + M                      2.32E+13   0.0    4.69E+04!Baulch

2CCl3 = C2Cl6                            4.55E+12  -1.6    3.58E+02!Kovacs

C2Cl6 + CCl3 = CCl4 + C2Cl5              7.94E+11   0.0    1.43E+04!Kovacs

C2Cl5 + Cl2 = C2Cl6 + Cl                 2.04E+11   0.0    2.37E+03!Kovacs,Duso

C2Cl5 = C2Cl4 + Cl                       1.12E+16   0.0    1.49E+04!Kovacs

C2Cl5 + Cl = C2Cl4 + Cl2                 2.45E+13   0.0    0.0     !Kovacs,Huv

2CCl + M  = C2Cl2 + M                    5.40E+14   0.0    1.52E+04!Kovacs  

2CCl2 + M  = C2Cl4 + M                   5.70E+15   0.0    5.95E+03!Kumaran

C2Cl2 + Cl + M  = C2Cl3 + M              3.55E+07   0.9    1.11E+04!Kovacs

C2Cl2 + M = C2 + 2Cl + M                 9.28E+15   0.0    6.78E+04!Kumaran 

C2Cl3 + Cl = C2Cl4                       2.45E+13   0.0    0.0     !Kovacs

C2Cl2 + Cl = C2Cl + Cl2                  2.00E+14   0.0    5.25E+04!Zhiltsova

C2Cl2 = C2Cl + Cl                        5.00E+15   0.0    1.08E+05!Zhiltsova

C2Cl3 + C2Cl = C2Cl2 + C2Cl2             1.00E+13   0.0    0.0     !Zhiltsova

C2Cl3 + Cl = C2Cl2 + Cl2                 1.00E+13   0.0    0.0     !Zhiltsova

C2Cl3 + C2Cl3 = C4Cl6                    1.20E+09   1.0    6.69E+02!Zhiltsova

C2Cl2 + C2Cl = C4Cl3                     1.00E+13   0.0    0.0     !Zhiltsova

C2Cl2 + C2Cl2 = C4Cl3 + Cl               1.52E+13   0.0   1.7E+04  !Zhiltsova

C4Cl3 = C4Cl2 + Cl                       2.51E+13   0.0   4.90E+04 !Zhiltsova

C4Cl3 + Cl = C4Cl2 + Cl2                 8.12E+13   0.0    0.0     !Zhiltsova 

C2Cl2 + C2Cl2 = C4Cl4                    2.00E+13   0.0    3.02E+04!Zhiltsova

C4Cl4 + Cl = C4Cl3 + Cl2                 7.94E+14   0.0    2.92E+04!Zhiltsova

C4Cl4 = C4Cl3 + Cl                       1.00E+16   0.0    8.45E+04!Zhiltsova

C4Cl4 + C2Cl = C4Cl3 + C2Cl2             3.98E+13   0.0    0.0     !Zhiltsova

C4Cl4 + M = C4Cl2 + Cl2 + M              3.31E+16   0.0    6.00E+04!Zhiltsova

C2Cl3 + C2Cl2 = C4Cl4 + Cl               1.56E+13   0.0    0.0     !Zhiltsova

C2Cl3 + C2Cl2 = C4Cl5                    1.00E+12   0.0    6.04E+03!Zhiltsova

C4Cl6 = C4Cl5 + Cl                       2.00E+16   0.0    7.07E+04!Zhiltsova

C4Cl5 = C4Cl4 + Cl                       2.51E+13   0.0    3.44E+04!Zhiltsova

C4Cl6 + Cl = C4Cl5 + Cl2                 6.02E+14   0.0    1.53E+04!Zhiltsova

C4Cl3 + C2Cl2 = C6Cl5                    4.27E+12   0.0    5.04E+03!Zhiltsova

C6Cl6 = C6Cl5 + Cl                       2.00E+16   0.0    9.00E+04!Zhiltsova

C6Cl6 + Cl = C6Cl5 + Cl2                 6.03E+14   0.0    3.68E+04!Zhiltsova

C4Cl6 + C2Cl2 = C6Cl6 + Cl2              1.00E+14   0.0    0.0     !HB 

!**************************************************************************

! CnCl2 reactions

!**************************************************************************

C2Cl2 + C2Cl = C4Cl2 + Cl                4.47E+13   0.0    0.0E+03  !Zhiltsova 

C2Cl2 + C2Cl2 = C4Cl2 + Cl2              1.00E+14   0.0    0.0E+03  !Zhiltsova

C4Cl2 + C2Cl  = C6Cl2 + Cl               2.00E+13   0.0    0.0E+03  !Zhiltsova

C4Cl2 + C2Cl2 = C6Cl2 + Cl2              1.00E+14   0.0    0.0E+03  !HB1

C6Cl2 + C2Cl  = C8Cl2 + Cl               2.00E+13   0.0    0.0E+03  !Zhiltsova

C6Cl2 + C2Cl2 = C8Cl2 + Cl2              1.00E+14   0.0    0.0E+03  !HB1 

C8Cl2 + C2Cl  = C10Cl2 + Cl              2.00E+13   0.0    0.0E+03  !Zhiltsova

C8Cl2 + C2Cl2 = C10Cl2 + Cl2             1.00E+14   0.0    0.0E+03  !HB1

C10Cl2 + C2Cl  = C12Cl2 + Cl             2.00E+13   0.0    0.0E+03  !Zhiltsova

C10Cl2 + C2Cl2 = C12Cl2 + Cl2            1.00E+14   0.0    0.0E+03  !HB1 

C6Cl2 + C6Cl2 = C12 + Cl2 + Cl2          8.32E+12   0.0    0.0E+03  !HB2

C8Cl2 + C6Cl2 = C14 + Cl2 + Cl2          8.32E+12   0.0    0.0E+03  !HB2

C8Cl2 + C8Cl2 => C16 + Cl2 + Cl2         8.32E+12   0.0    0.0E+03  !Zhiltsova

C10Cl2 + C6Cl2 => C16 + Cl2 + Cl2        8.32E+12   0.0    0.0E+03  !Zhiltsova

C10Cl2 + C8Cl2 => C18 + Cl2 + Cl2        8.32E+12   0.0    0.0E+03  !Zhiltsova

C10Cl2 + C10Cl2 => C20 + Cl2 + Cl2       8.32E+12   0.0    0.0E+03  !Zhiltsova

C12Cl2 + C6Cl2 => C18 + Cl2 + Cl2        8.32E+12   0.0    0.0E+03  !HB2

C12Cl2 + C8Cl2 => C20 + Cl2 + Cl2        8.32E+12   0.0    0.0E+03  !HB2 

C12Cl2 + C10Cl2 => C22 + Cl2 + Cl2       8.32E+12   0.0    0.0E+03  !HB2

C12Cl2 + C12Cl2 => C24 + Cl2 + Cl2       8.32E+12   0.0    0.0E+03  !HB2 

!**************************************************************************

!**************************************************************************

! Growth of Cn species

!**************************************************************************

!**************************************************************************

C1 + C1 = C2                             4.50E+11   0.5    0.0     !Sojka

C1 + C2Cl = C3 + Cl                      8.71E+09   0.5    0.0     !Zhiltsova

C1  + C2Cl2 = C3 + Cl2                   8.32E+09   0.5    0.00E+04!Zhiltsova

C2  + C1  = C3                           4.50E+11   0.5    0.0     !Sojka

C2 + C2Cl = C4 + Cl                      8.71E+09   0.5    0.0     !Zhiltsova

C2  + C2Cl2 = C4 + Cl2                   8.32E+09   0.5    0.00E+04!Zhiltsova

C3  + C1  = C4                           4.50E+11   0.5    0.0     !Sojka

C3 + C2Cl = C5 + Cl                      8.71E+09   0.5    0.0     !Zhiltsova

C3  + C2Cl2 = C5 + Cl2                   8.32E+09   0.5    0.00E+04!Zhiltsova

C4  + C1  = C5                           4.50E+11   0.5    0.0     !Sojka

C4 + C2Cl = C6 + Cl                      8.71E+09   0.5    0.0     !Zhiltsova

C4  + C2Cl2 = C6 + Cl2                   8.32E+09   0.5    0.00E+04!Zhiltsova

C5  + C1  = C6                           4.50E+11   0.5    0.0     !Sojka

C5 + C2Cl = C7 + Cl                      8.71E+09   0.5    0.0     !Zhiltsova

C5  + C2Cl2 = C7 + Cl2                   8.32E+09   0.5    0.00E+04!Zhiltsova

C6  + C1  = C7                           4.50E+11   0.5    0.0     !Sojka

C6 + C2Cl = C8 + Cl                      8.71E+09   0.5    0.0     !Zhiltsova

C6  + C2Cl2 = C8 + Cl2                   8.32E+09   0.5    0.00E+04!Zhiltsova

C7  + C2Cl2 = C9 + Cl2                   8.32E+09   0.5    0.00E+04!Zhiltsova

C7  + C2Cl = C9 + Cl                     8.71E+09   0.5    0.00E+04!Zhiltsova

C7  + C1  = C8                           4.50E+11   0.5    0.0     !Sojka

C8  + C2Cl2 = C10 + Cl2                  8.32E+09   0.5    0.00E+04!Sojka

C8  + C2Cl = C10 + Cl                    8.71E+09   0.5    0.00E+04!Zhiltsova

C8  + C1  = C9                           9.00E+10   0.5    0.0     !Sojka

C9  + C2Cl2 = C11 + Cl2                  8.32E+09   0.5    0.00E+04!Zhiltsova

C9  + C2Cl = C11 + Cl                    8.71E+09   0.5    0.00E+04!Zhiltsova

C9  + C1  = C10                          4.50E+11   0.5    0.0     !Sojka

C10  + C2Cl2 = C12 + Cl2                 8.32E+09   0.5    0.00E+04!Zhiltsova

C10  + C2Cl = C12 + Cl                   8.71E+09   0.5    0.00E+04!Zhiltsova

C10  + C1  = C11                         4.50E+11   0.5    0.0     !Sojka

C11  + C2Cl2 => C13 + Cl2                8.32E+09   0.5    0.00E+04!Zhiltsova

C11  + C2Cl => C13 + Cl                  8.71E+09   0.5    0.00E+04!Zhiltsova

C11  + C1  = C12                         4.50E+11   0.5    0.0     !Sojka

C12  + C2Cl2 => C14 + Cl2                8.32E+09   0.5    0.00E+04!Zhiltsova

C12  + C2Cl => C14 + Cl                  8.71E+09   0.5    0.00E+04!Zhiltsova

C12  + C1  => C13                        4.50E+11   0.5    0.0     !Sojka

C13  + C2Cl2 => C15 + Cl2                8.32E+09   0.5    0.00E+04!Zhiltsova

C13  + C2Cl => C15 + Cl                  8.71E+09   0.5    0.00E+04!Zhiltsova

C13  + C1  => C14                        4.50E+11   0.5    0.0     !Sojka

C14  + C2Cl2 => C16 + Cl2                8.32E+09   0.5    0.00E+04!Zhiltsova

C14  + C2Cl => C16 + Cl                  8.71E+09   0.5    0.00E+04!Zhiltsova

C14  + C1  => C15                        4.50E+11   0.5    0.0     !Sojka

C15  + C2Cl2 => C17 + Cl2                8.32E+09   0.5    0.00E+04!Zhiltsova

C15  + C2Cl => C17 + Cl                  8.71E+09   0.5    0.00E+04!Zhiltsova

C15  + C1  => C16                        4.50E+11   0.5    0.0     !Sojka

C16  + C2Cl2 => C18 + Cl2                8.32E+09   0.5    0.00E+04!Zhiltsova

C16  + C2Cl => C18 + Cl                  8.71E+09   0.5    0.00E+04!Zhiltsova

C16  + C1  => C17                        4.50E+11   0.5    0.0     !Sojka

C17  + C2Cl2 => C19 + Cl2                8.32E+09   0.5    0.00E+04!Zhiltsova

C17  + C2Cl => C19 + Cl                  8.71E+09   0.5    0.00E+04!Zhiltsova

C17  + C1  => C18                        4.50E+11   0.5    0.0     !Sojka

C18  + C2Cl2 => C20 + Cl2                8.32E+09   0.5    0.00E+04!Zhiltsova

C18  + C2Cl => C20 + Cl                  8.71E+09   0.5    0.00E+04!Zhiltsova

C18  + C1  => C19                        4.50E+11   0.5    0.0     !Sojka

C19  + C2Cl2 => C21 + Cl2                8.32E+09   0.5    0.0E+04 !Zhiltsova

C19  + C2Cl => C21 + Cl                  8.71E+09   0.5    0.0E+04 !Zhiltsova

C19  + C1  => C20                        4.50E+11   0.5    0.0     !Sojka

C20  + C2Cl2 => C22 + Cl2                8.32E+09   0.5    0.0E+04 !Zhiltsova

C20  + C2Cl => C22 + Cl                  8.71E+09   0.5    0.0E+04 !Zhiltsova

C20  + C1  => C21                        4.50E+11   0.5    0.0     !Sojka

C21  + C2Cl2 => C23 + Cl2                8.32E+09   0.5    0.0E+04 !Zhiltsova

C21  + C2Cl => C23 + Cl                  8.71E+09   0.5    0.0E+04 !Zhiltsova

C21  + C1  => C22                        4.50E+11   0.5    0.0     !Sojka

C22  + C2Cl2 => C24 + Cl2                8.32E+09   0.5    0.0E+04 !Zhiltsova

C22  + C2Cl => C24 + Cl                  8.71E+09   0.5    0.0E+04 !Zhiltsova

C22  + C1  => C23                        4.50E+11   0.5    0.0     !Sojka

C23  + C2Cl2 => C25 + Cl2                8.32E+09   0.5    0.0E+04 !Zhiltsova

C23  + C2Cl => C25 + Cl                  8.71E+09   0.5    0.0E+04 !Zhiltsova

C23  + C1  => C24                        4.50E+11   0.5    0.0     !Sojka

C24  + C2Cl2 => C26 + Cl2                8.32E+09   0.5    0.0E+04 !Zhiltsova

C24  + C2Cl => C26 + Cl                  8.71E+09   0.5    0.0E+04 !Zhiltsova

C24  + C1  => C25                        4.50E+11   0.5    0.0     !Sojka

C25  + C2Cl2 => C27 + Cl2                8.32E+09   0.5    0.0E+04 !Zhiltsova

C25  + C2Cl => C27 + Cl                  8.71E+09   0.5    0.0E+04 !Zhiltsova

C25  + C1  => C26                        4.50E+11   0.5    0.0     !Sojka

C26  + C2Cl2 => C28 + Cl2                8.32E+09   0.5    0.0E+04 !Zhiltsova

C26  + C2Cl => C28 + Cl                  8.71E+09   0.5    0.0E+04 !Zhiltsova

C26  + C1  => C27                        4.50E+11   0.5    0.0     !Sojka

C27  + C2Cl2 => C29 + Cl2                8.32E+09   0.5    0.0E+04 !Zhiltsova

C27  + C2Cl => C29 + Cl                  8.71E+09   0.5    0.0E+04 !Zhiltsova

C27  + C1  => C28                        4.50E+11   0.5    0.0     !Sojka

C28  + C2Cl2 => C30 + Cl2                8.32E+09   0.5    0.0E+04 !Zhiltsova

C28  + C2Cl => C30 + Cl                  8.71E+09   0.5    0.0E+04 !Zhiltsova

C28  + C1  => C29                        4.50E+11   0.5    0.0     !Sojka

C29  + C2Cl2 => C31 + Cl2                8.32E+09   0.5    0.0E+04 !Zhiltsova

C29  + C2Cl => C31 + Cl                  8.71E+09   0.5    0.0E+04 !Zhiltsova

C29  + C1  => C30                        9.00E+10   0.5    0.0     !Sojka

!************************************************************************

!Coagulation of gas phase species 

!************************************************************************

C28  + C2 => C30                         4.50E+12   0.5    0.0     !Sojka

C27  + C3 => C30                         4.50E+12   0.5    0.0     !Sojka

C26  + C4 => C30                         4.50E+12   0.5    0.0     !Sojka

C25  + C5 => C30                         4.50E+12   0.5    0.0     !Sojka

C24  + C6 => C30                         4.50E+12   0.5    0.0     !Sojka

C23  + C7 => C30                         4.50E+12   0.5    0.0     !Sojka

C22  + C8 => C30                         4.50E+12   0.5    0.0     !Sojka

C21  + C9 => C30                         4.50E+12   0.5    0.0     !Sojka

C20  + C10 => C30                        4.50E+12   0.5    0.0     !Sojka

C19  + C11 => C30                        4.50E+12   0.5    0.0     !Sojka

C18  + C12 => C30                        4.50E+12   0.5    0.0     !Sojka 

C17  + C13 => C30                        4.50E+12   0.5    0.0     !Sojka

C16  + C14 => C30                        4.50E+12   0.5    0.0     !Sojka

C15  + C15 => C30                        4.50E+12   0.5    0.0     !Sojka 

C27  + C2 => C29                         4.50E+12   0.5    0.0     !Sojka

C26  + C3 => C29                         4.50E+12   0.5    0.0     !Sojka

C25  + C4 => C29                         4.50E+12   0.5    0.0     !Sojka

C24  + C5 => C29                         4.50E+12   0.5    0.0     !Sojka

C23  + C6 => C29                         4.50E+12   0.5    0.0     !Sojka

C22  + C7 => C29                         4.50E+12   0.5    0.0     !Sojka

C21  + C8 => C29                         4.50E+12   0.5    0.0     !Sojka

C20  + C9 => C29                         4.50E+12   0.5    0.0     !Sojka

C19  + C10 => C29                        4.50E+12   0.5    0.0     !Sojka

C18  + C11 => C29                        4.50E+12   0.5    0.0     !Sojka

C17  + C12 => C29                        4.50E+12   0.5    0.0     !Sojka 

C16  + C13 => C29                        4.50E+12   0.5    0.0     !Sojka

C15  + C14 => C29                        4.50E+12   0.5    0.0     !Sojka

C26  + C2 => C28                         4.50E+12   0.5    0.0     !Sojka

C25  + C3 => C28                         4.50E+12   0.5    0.0     !Sojka

C24  + C4 => C28                         4.50E+12   0.5    0.0     !Sojka

C23  + C5 => C28                         4.50E+12   0.5    0.0     !Sojka

C22  + C6 => C28                         4.50E+12   0.5    0.0     !Sojka

C21  + C7 => C28                         4.50E+12   0.5    0.0     !Sojka

C20  + C8 => C28                         4.50E+12   0.5    0.0     !Sojka

C19  + C9 => C28                         4.50E+12   0.5    0.0     !Sojka

C18  + C10 => C28                        4.50E+12   0.5    0.0     !Sojka

C17  + C11 => C28                        4.50E+12   0.5    0.0     !Sojka

C16  + C12 => C28                        4.50E+12   0.5    0.0     !Sojka 

C15  + C13 => C28                        4.50E+12   0.5    0.0     !Sojka

C14  + C14 => C28                        4.50E+12   0.5    0.0     !Sojka

C25  + C2 => C27                         4.50E+12   0.5    0.0     !Sojka

C24  + C3 => C27                         4.50E+12   0.5    0.0     !Sojka

C23  + C4 => C27                         4.50E+12   0.5    0.0     !Sojka

C22 + C5 => C27                          4.50E+12   0.5    0.0     !Sojka

C21  + C6 => C27                         4.50E+12   0.5    0.0     !Sojka

C20  + C7 => C27                         4.50E+12   0.5    0.0     !Sojka

C19  + C8 => C27                         4.50E+12   0.5    0.0     !Sojka

C18  + C9 => C27                         4.50E+12   0.5    0.0     !Sojka

C17  + C10 => C27                        4.50E+12   0.5    0.0     !Sojka

C16  + C11 => C27                        4.50E+12   0.5    0.0     !Sojka

C15  + C12 => C27                        4.50E+12   0.5    0.0     !Sojka 

C14  + C13 => C27                        4.50E+12   0.5    0.0     !Sojka

C24  + C2 => C26                         4.50E+12   0.5    0.0     !Sojka

C23  + C3 => C26                         4.50E+12   0.5    0.0     !Sojka

C22  + C4 => C26                         4.50E+12   0.5    0.0     !Sojka

C21 + C5 => C26                          4.50E+12   0.5    0.0     !Sojka

C20  + C6 => C26                         4.50E+12   0.5    0.0     !Sojka

C19  + C7 => C26                         4.50E+12   0.5    0.0     !Sojka

C18  + C8 => C26                         4.50E+12   0.5    0.0     !Sojka

C17  + C9 => C26                         4.50E+12   0.5    0.0     !Sojka

C16  + C10 => C26                        4.50E+12   0.5    0.0     !Sojka

C15  + C11 => C26                        4.50E+12   0.5    0.0     !Sojka

C14  + C12 => C26                        4.50E+12   0.5    0.0     !Sojka 

C13  + C13 => C26                        4.50E+12   0.5    0.0     !Sojka

C23  + C2 => C25                         4.50E+12   0.5    0.0     !Sojka

C22  + C3 => C25                         4.50E+12   0.5    0.0     !Sojka

C21  + C4 => C25                         4.50E+12   0.5    0.0     !Sojka

C20 + C5 => C25                          4.50E+12   0.5    0.0     !Sojka

C19  + C6 => C25                         4.50E+12   0.5    0.0     !Sojka

C18  + C7 => C25                         4.50E+12   0.5    0.0     !Sojka

C17  + C8 => C25                         4.50E+12   0.5    0.0     !Sojka

C16  + C9 => C25                         4.50E+12   0.5    0.0     !Sojka

C15  + C10 => C25                        4.50E+12   0.5    0.0     !Sojka

C14  + C11 => C25                        4.50E+12   0.5    0.0     !Sojka

C13  + C12 => C25                        4.50E+12   0.5    0.0     !Sojka 

C22  + C2 => C24                         4.50E+12   0.5    0.0     !Sojka

C21  + C3 => C24                         4.50E+12   0.5    0.0     !Sojka

C20  + C4 => C24                         4.50E+12   0.5    0.0     !Sojka

C19 + C5 => C24                          4.50E+12   0.5    0.0     !Sojka

C18  + C6 => C24                         4.50E+12   0.5    0.0     !Sojka

C17  + C7 => C24                         4.50E+12   0.5    0.0     !Sojka

C16  + C8 => C24                         4.50E+12   0.5    0.0     !Sojka

C15  + C9 => C24                         4.50E+12   0.5    0.0     !Sojka

C14  + C10 => C24                        4.50E+12   0.5    0.0     !Sojka

C13  + C11 => C24                        4.50E+12   0.5    0.0     !Sojka

C12  + C12 => C24                        4.50E+12   0.5    0.0     !Sojka 

C21 + C2 => C23                          4.50E+12   0.5    0.0     !Sojka

C20  + C3 => C23                         4.50E+12   0.5    0.0     !Sojka

C19  + C4 => C23                         4.50E+12   0.5    0.0     !Sojka

C18 + C5 => C23                          4.50E+12   0.5    0.0     !Sojka

C17  + C6 => C23                         4.50E+12   0.5    0.0     !Sojka

C16  + C7 => C23                         4.50E+12   0.5    0.0     !Sojka

C15  + C8 => C23                         4.50E+12   0.5    0.0     !Sojka

C14  + C9 => C23                         4.50E+12   0.5    0.0     !Sojka

C13  + C10 => C23                        4.50E+12   0.5    0.0     !Sojka

C12  + C11 => C23                        4.50E+12   0.5    0.0     !Sojka

C20 + C2 => C22                          4.50E+12   0.5    0.0     !Sojka

C19  + C3 => C22                         4.50E+12   0.5    0.0     !Sojka

C18  + C4 => C22                         4.50E+12   0.5    0.0     !Sojka

C17 + C5 => C22                          4.50E+12   0.5    0.0     !Sojka

C16  + C6 => C22                         4.50E+12   0.5    0.0     !Sojka

C15  + C7 => C22                         4.50E+12   0.5    0.0     !Sojka

C14  + C8 => C22                         4.50E+12   0.5    0.0     !Sojka

C13  + C9 => C22                         4.50E+12   0.5    0.0     !Sojka

C12  + C10 => C22                        4.50E+12   0.5    0.0     !Sojka

C11  + C11 => C22                        4.50E+12   0.5    0.0     !Sojka

C19 + C2 => C21                          4.50E+12   0.5    0.0     !Sojka

C18  + C3 => C21                         4.50E+12   0.5    0.0     !Sojka

C17  + C4 => C21                         4.50E+12   0.5    0.0     !Sojka

C16 + C5 => C21                          4.50E+12   0.5    0.0     !Sojka

C15  + C6 => C21                         4.50E+12   0.5    0.0     !Sojka

C14  + C7 => C21                         4.50E+12   0.5    0.0     !Sojka

C13  + C8 => C21                         4.50E+12   0.5    0.0     !Sojka

C12  + C9 => C21                         4.50E+12   0.5    0.0     !Sojka

C11  + C10 => C21                        4.50E+12   0.5    0.0     !Sojka

C18 + C2 => C20                          4.50E+12   0.5    0.0     !Sojka

C17  + C3 => C20                         4.50E+12   0.5    0.0     !Sojka

C16  + C4 => C20                         4.50E+12   0.5    0.0     !Sojka

C15 + C5 => C20                          4.50E+12   0.5    0.0     !Sojka

C14  + C6 => C20                         4.50E+12   0.5    0.0     !Sojka

C13  + C7 => C20                         4.50E+12   0.5    0.0     !Sojka

C12  + C8 => C20                         4.50E+12   0.5    0.0     !Sojka

C11  + C9 => C20                         4.50E+12   0.5    0.0     !Sojka

C10  + C10 => C20                        4.50E+12   0.5    0.0     !Sojka

C17 + C2 => C19                          4.50E+12   0.5    0.0     !Sojka

C16  + C3 => C19                         4.50E+12   0.5    0.0     !Sojka

C15  + C4 => C19                         4.50E+12   0.5    0.0     !Sojka

C14 + C5 => C19                          4.50E+12   0.5    0.0     !Sojka

C13  + C6 => C19                         4.50E+12   0.5    0.0     !Sojka

C12  + C7 => C19                         4.50E+12   0.5    0.0     !Sojka

C11  + C8 => C19                         4.50E+12   0.5    0.0     !Sojka

C10  + C9 => C19                         4.50E+12   0.5    0.0     !Sojka

C16 + C2 => C18                          4.50E+12   0.5    0.0     !Sojka

C15  + C3 => C18                         4.50E+12   0.5    0.0     !Sojka

C14  + C4 => C18                         4.50E+12   0.5    0.0     !Sojka

C13 + C5 => C18                          4.50E+12   0.5    0.0     !Sojka

C12  + C6 => C18                         4.50E+12   0.5    0.0     !Sojka

C11  + C7 => C18                         4.50E+12   0.5    0.0     !Sojka

C10  + C8 => C18                         4.50E+12   0.5    0.0     !Sojka

C9   + C9 => C18                         4.50E+12   0.5    0.0     !Sojka

C15 + C2 => C17                          4.50E+12   0.5    0.0     !Sojka

C14  + C3 => C17                         4.50E+12   0.5    0.0     !Sojka

C13  + C4 => C17                         4.50E+12   0.5    0.0     !Sojka

C12 + C5 => C17                          4.50E+12   0.5    0.0     !Sojka

C11  + C6 => C17                         4.50E+12   0.5    0.0     !Sojka

C10  + C7 => C17                         4.50E+12   0.5    0.0     !Sojka

C9   + C8 => C17                         4.50E+12   0.5    0.0     !Sojka

C14 + C2 => C16                          4.50E+12   0.5    0.0     !Sojka

C13  + C3 => C16                         4.50E+12   0.5    0.0     !Sojka

C12  + C4 => C16                         4.50E+12   0.5    0.0     !Sojka

C11 + C5 => C16                          4.50E+12   0.5    0.0     !Sojka

C10  + C6 => C16                         4.50E+12   0.5    0.0     !Sojka

C9   + C7 => C16                         4.50E+12   0.5    0.0     !Sojka

C8   + C8 => C16                         4.50E+12   0.5    0.0     !Sojka

C13 + C2 => C15                          4.50E+12   0.5    0.0     !Sojka

C12  + C3 => C15                         4.50E+12   0.5    0.0     !Sojka

C11  + C4 => C15                         4.50E+12   0.5    0.0     !Sojka

C10 + C5 => C15                          4.50E+12   0.5    0.0     !Sojka

C9  + C6 => C15                          4.50E+12   0.5    0.0     !Sojka

C8   + C7 => C15                         4.50E+12   0.5    0.0     !Sojka

C12 + C2 => C14                          4.50E+12   0.5    0.0     !Sojka

C11  + C3 => C14                         4.50E+12   0.5    0.0     !Sojka

C10  + C4 => C14                         4.50E+12   0.5    0.0     !Sojka

C9  + C5 => C14                          4.50E+12   0.5    0.0     !Sojka

C8  + C6 => C14                          4.50E+12   0.5    0.0     !Sojka

C7   + C7 => C14                         4.50E+12   0.5    0.0     !Sojka

C11 + C2 => C13                          4.50E+12   0.5    0.0     !Sojka

C10  + C3 => C13                         4.50E+12   0.5    0.0     !Sojka

C9  + C4 => C13                          4.50E+12   0.5    0.0     !Sojka

C8  + C5 => C13                          4.50E+12   0.5    0.0     !Sojka

C7  + C6 => C13                          4.50E+12   0.5    0.0     !Sojka

C10 + C2 => C12                          4.50E+12   0.5    0.0     !Sojka

C9  + C3 => C12                          4.50E+12   0.5    0.0     !Sojka

C8  + C4 => C12                          4.50E+12   0.5    0.0     !Sojka

C7  + C5 => C12                          4.50E+12   0.5    0.0     !Sojka

C6  + C6 => C12                          4.50E+12   0.5    0.0     !Sojka

C9 + C2 => C11                           4.50E+12   0.5    0.0     !Sojka

C8  + C3 => C11                          4.50E+12   0.5    0.0     !Sojka

C7  + C4 => C11                          4.50E+12   0.5    0.0     !Sojka

C6  + C5 => C11                          4.50E+12   0.5    0.0     !Sojka

C8 + C2 => C10                           4.50E+12   0.5    0.0     !Sojka

C7  + C3 => C10                          4.50E+12   0.5    0.0     !Sojka

C6  + C4 => C10                          4.50E+12   0.5    0.0     !Sojka

C5  + C5 => C10                          4.50E+12   0.5    0.0     !Sojka

C7 + C2 => C9                            4.50E+12   0.5    0.0     !Sojka

C6  + C3 => C9                           4.50E+12   0.5    0.0     !Sojka

C5  + C4 => C9                           4.50E+12   0.5    0.0     !Sojka

C6 + C2 => C8                            4.50E+12   0.5    0.0     !Sojka

C5  + C3 => C8                           4.50E+12   0.5    0.0     !Sojka

C4  + C4 => C8                           4.50E+12   0.5    0.0     !Sojka

C5 + C2 =  C7                            4.50E+12   0.5    0.0     !Sojka

C4  + C3 =  C7                           4.50E+12   0.5    0.0     !Sojka

C4 + C2 =  C6                            4.50E+12   0.5    0.0     !Sojka

C3  + C3 =  C6                           4.50E+12   0.5    0.0     !Sojka

C3 + C2 =  C5                            4.50E+12   0.5    0.0     !Sojka

C2 + C2 =  C4                            4.50E+12   0.5    0.0     !Sojka

!************************************************************************

!Precursor formation

!************************************************************************

C30  + C1 => C31                         4.50E+12   0.5    0.0     !Sojka

C29  + C2 => C31                         4.50E+12   0.5    0.0     !Sojka

C28  + C3 => C31                         4.50E+12   0.5    0.0     !Sojka

C27  + C4 => C31                         4.50E+12   0.5    0.0     !Sojka

C26  + C5 => C31                         4.50E+12   0.5    0.0     !Sojka

C25  + C6 => C31                         4.50E+12   0.5    0.0     !Sojka

C24  + C7 => C31                         4.50E+12   0.5    0.0     !Sojka

C23  + C8 => C31                         4.50E+12   0.5    0.0     !Sojka

C22  + C9 => C31                         4.50E+12   0.5    0.0     !Sojka

C21  + C10 => C31                        4.50E+12   0.5    0.0     !Sojka

C20  + C11 => C31                        4.50E+12   0.5    0.0     !Sojka

C19  + C12 => C31                        4.50E+12   0.5    0.0     !Sojka

C18  + C13 => C31                        4.50E+12   0.5    0.0     !Sojka

C17  + C14 => C31                        4.50E+12   0.5    0.0     !Sojka

C16  + C15 => C31                        4.50E+12   0.5    0.0     !Sojka

!************************************************************************

!Precursor growth 

!************************************************************************

C30  + C2Cl2 => C32 + Cl2                8.32E+09   0.5    0.0E+04 !Zhiltsova

C30  + C2Cl => C32 + Cl                  8.71E+09   0.5    0.0E+04 !Zhiltsova

C30  + C2  => C32                        4.50E+11   0.5    0.0     !Sojka

C31  + C1 => C32                         4.50E+11   0.5    0.0     !Sojka

C31  + C2Cl2 => C33 + Cl2                8.32E+09   0.5    0.0E+04 !Zhiltsova

C31  + C2Cl => C33 + Cl                  8.71E+09   0.5    0.0E+04 !Zhiltsova

C31  + C2  => C33                        4.50E+11   0.5    0.0     !Sojka

C32  + C1 => C33                         4.50E+11   0.5    0.0     !Sojka

C32  + C2Cl2 => C34 + Cl2                8.32E+09   0.5    0.0E+04 !Zhiltsova

C32  + C2Cl => C34 + Cl                  8.71E+09   0.5    0.0E+04 !Zhiltsova

C32  + C2  => C34                        4.50E+11   0.5    0.0     !Sojka

C33  + C1 => C34                         4.50E+11   0.5    0.0     !Sojka

C33  + C2Cl2 => C35 + Cl2                8.32E+09   0.5    0.0E+04 !Zhiltsova

C33  + C2Cl => C35 + Cl                  8.71E+09   0.5    0.0E+04 !Zhiltsova

C33  + C2  => C35                        4.50E+11   0.5    0.0     !Sojka

C34  + C1 => C35                         4.50E+11   0.5    0.0     !Sojka

C34  + C2Cl2 => C36 + Cl2                8.32E+09   0.5    0.0E+04 !Zhiltsova

C34  + C2Cl => C36 + Cl                  8.71E+09   0.5    0.0E+04 !Zhiltsova

C34  + C2  => C36                        4.50E+11   0.5    0.0     !Sojka

C35  + C1 => C36                         4.50E+11   0.5    0.0     !Sojka

C35  + C2Cl2 => C37 + Cl2                8.32E+09   0.5    0.0E+04 !Zhiltsova

C35  + C2Cl => C37 + Cl                  8.71E+09   0.5    0.0E+04 !Zhiltsova

C35  + C2  => C37                        4.50E+11   0.5    0.0     !Sojka

C36  + C1 => C37                         4.50E+11   0.5    0.0     !Sojka

C36  + C2Cl2 => C38 + Cl2                8.32E+09   0.5    0.0E+04 !Zhiltsova

C36  + C2Cl => C38 + Cl                  8.71E+09   0.5    0.0E+04 !Zhiltsova

C36  + C2  => C38                        4.50E+11   0.5    0.0     !Sojka

C37  + C1 => C38                         4.50E+11   0.5    0.0     !Sojka

C37  + C2Cl2 => C39 + Cl2                8.32E+09   0.5    0.0E+04 !Zhiltsova

C37  + C2Cl => C39 + Cl                  8.71E+09   0.5    0.0E+04 !Zhiltsova

C37  + C2  => C39                        4.50E+11   0.5    0.0     !Sojka

C38  + C1 => C39                         4.50E+11   0.5    0.0     !Sojka

C38  + C2Cl2 => C40 + Cl2                8.32E+09   0.5    0.0E+04 !Zhiltsova

C38  + C2Cl => C40 + Cl                  8.71E+09   0.5    0.0E+04 !Zhiltsova

C38  + C2  => C40                        4.50E+11   0.5    0.0     !Sojka

C39  + C1 => C40                         4.50E+11   0.5    0.0     !Sojka

C39  + C2Cl2 => C41 + Cl2                8.32E+09   0.5    0.0E+04 !Zhiltsova

C39  + C2Cl => C41 + Cl                  8.71E+09   0.5    0.0E+04 !Zhiltsova

C39 + C2  => C41                         4.50E+11   0.5    0.0     !Sojka

C40  + C1 => C41                         4.50E+11   0.5    0.0     !Sojka

C40  + C2Cl2 => C42 + Cl2                8.32E+09   0.5    0.0E+04 !Zhiltsova

C40  + C2Cl => C42 + Cl                  8.71E+09   0.5    0.0E+04 !Zhiltsova

C40 + C2  => C42                         4.50E+11   0.5    0.0     !Sojka

C41  + C1 => C42                         4.50E+11   0.5    0.0     !Sojka

C41  + C2Cl2 => C43 + Cl2                8.32E+09   0.5    0.0E+04 !Zhiltsova

C41  + C2Cl => C43 + Cl                  8.71E+09   0.5    0.0E+04 !Zhiltsova

C41 + C2  => C43                         4.50E+11   0.5    0.0     !Sojka

C42  + C2Cl2 => C44 + Cl2                8.32E+09   0.5    0.0E+04 !Zhiltsova

C42  + C2Cl => C44 + Cl                  8.71E+09   0.5    0.0E+04 !Zhiltsova

C42 + C2  => C44                         4.50E+11   0.5    0.0     !Sojka

C42  + C1 => C43                         4.50E+11   0.5    0.0     !Sojka

C43  + C2Cl2 => C45 + Cl2                8.32E+09   0.5    0.0E+04 !Zhiltsova

C43  + C2Cl => C45 + Cl                  8.71E+09   0.5    0.0E+04 !Zhiltsova

C43 + C2  => C45                         4.50E+11   0.5    0.0     !Sojka

C43  + C1 => C44                         4.50E+11   0.5    0.0     !Sojka

C44  + C2Cl2 => C46 + Cl2                8.32E+09   0.5    0.0E+04 !Zhiltsova

C44  + C2Cl => C46 + Cl                  8.71E+09   0.5    0.0E+04 !Zhiltsova

C44 + C2  => C46                         4.50E+11   0.5    0.0     !Sojka

C44   + C1 => C45                        4.50E+11   0.5    0.0     !Sojka

C45  + C2Cl2 => C47 + Cl2                8.32E+09   0.5    0.0E+04 !Zhiltsova

C45  + C2Cl => C47 + Cl                  8.71E+09   0.5    0.0E+04 !Zhiltsova

C45 + C2  => C47                         4.50E+11   0.5    0.0     !Sojka

C45   + C1 => C46                        4.50E+11   0.5    0.0     !Sojka

C46  + C2Cl2 => C48 + Cl2                8.32E+09   0.5    0.0E+04 !Zhiltsova

C46  + C2Cl => C48 + Cl                  8.71E+09   0.5    0.0E+04 !Zhiltsova

C46 + C2  => C48                         4.50E+11   0.5    0.0     !Sojka

C46   + C1 => C47                        4.50E+11   0.5    0.0     !Sojka

C47  + C2Cl2 => C49 + Cl2                8.32E+09   0.5    0.0E+04 !Zhiltsova

C47  + C2Cl => C49 + Cl                  8.71E+09   0.5    0.0E+04 !Zhiltsova

C47 + C2  => C49                         4.50E+11   0.5    0.0     !Sojka

C47   + C1 => C48                        4.50E+11   0.5    0.0     !Sojka

C48  + C2Cl2 => C50 + Cl2                8.32E+09   0.5    0.0E+04 !Zhiltsova

C48  + C2Cl => C50 + Cl                  8.71E+09   0.5    0.0E+04 !Zhiltsova

C48 + C2  => C50                         4.50E+11   0.5    0.0     !Sojka

C48   + C1 => C49                        4.50E+11   0.5    0.0     !Sojka

C49  + C2Cl2 => C51 + Cl2                8.32E+09   0.5    0.0E+04 !Zhiltsova

C49  + C2Cl => C51 + Cl                  8.71E+09   0.5    0.0E+04 !Zhiltsova

C49 + C2  => C51                         4.50E+11   0.5    0.0     !Sojka

C49   + C1 => C50                        4.50E+11   0.5    0.0     !Sojka

C50  + C2Cl2 => C52 + Cl2                8.32E+09   0.5    0.0E+04 !Zhiltsova

C50  + C2Cl => C52 + Cl                  8.71E+09   0.5    0.0E+04 !Zhiltsova

C50 + C2  => C52                         4.50E+11   0.5    0.0     !Sojka

C50   + C1 => C51                        4.50E+11   0.5    0.0     !Sojka

C51  + C2Cl2 => C53 + Cl2                8.32E+09   0.5    0.0E+04 !Zhiltsova

C51  + C2Cl => C53 + Cl                  8.71E+09   0.5    0.0E+04 !Zhiltsova

C51 + C2  => C53                         4.50E+11   0.5    0.0     !Sojka

C51   + C1 => C52                        4.50E+11   0.5    0.0     !Sojka

C52  + C2Cl2 => C54 + Cl2                8.32E+09   0.5    0.0E+04 !Zhiltsova

C52  + C2Cl => C54 + Cl                  8.71E+09   0.5    0.0E+04 !Zhiltsova

C52 + C2  => C54                         4.50E+11   0.5    0.0     !Sojka

C52   + C1 => C53                        4.50E+11   0.5    0.0     !Sojka

C53  + C2Cl2 => C55 + Cl2                8.32E+09   0.5    0.0E+04 !Zhiltsova

C53  + C2Cl => C55 + Cl                  8.71E+09   0.5    0.0E+04 !Zhiltsova

C53 + C2  => C55                         4.50E+11   0.5    0.0     !Sojka

C53   + C1 => C54                        4.50E+11   0.5    0.0     !Sojka

C54  + C2Cl2 => C56 + Cl2                8.32E+09   0.5    0.0E+04 !Zhiltsova

C54  + C2Cl => C56 + Cl                  8.71E+09   0.5    0.0E+04 !Zhiltsova

C54 + C2  => C56                         4.50E+11   0.5    0.0     !Sojka

C54   + C1 => C55                        4.50E+11   0.5    0.0     !Sojka

C55  + C2Cl2 => C57 + Cl2                8.32E+09   0.5    0.0E+04 !Zhiltsova

C55  + C2Cl => C57 + Cl                  8.71E+09   0.5    0.0E+04 !Zhiltsova

C55 + C2  => C57                         4.50E+11   0.5    0.0     !Sojka

C55   + C1 => C56                        4.50E+11   0.5    0.0     !Sojka

C56  + C2Cl2 => C58 + Cl2                8.32E+09   0.5    0.0E+04 !Zhiltsova

C56  + C2Cl => C58 + Cl                  8.71E+09   0.5    0.0E+04 !Zhiltsova

C56 + C2  => C58                         4.50E+11   0.5    0.0     !Sojka

C56   + C1 => C57                        4.50E+11   0.5    0.0     !Sojka

C57  + C2Cl2 => C59 + Cl2                8.32E+09   0.5    0.0E+04 !Zhiltsova

C57  + C2Cl => C59 + Cl                  8.71E+09   0.5    0.0E+04 !Zhiltsova

C57 + C2  => C59                         4.50E+11   0.5    0.0     !Sojka

C57   + C1 => C58                        4.50E+11   0.5    0.0     !Sojka

C58  + C2Cl2 => C60 + Cl2                8.32E+09   0.5    0.0E+04 !Zhiltsova

C58  + C2Cl => C60 + Cl                  8.71E+09   0.5    0.0E+04 !Zhiltsova

C58 + C2  => C60                         4.50E+11   0.5    0.0     !Sojka

C58   + C1 => C59                        4.50E+11   0.5    0.0     !Sojka

C59  + C2Cl2 => C61 + Cl2                8.32E+09   0.5    0.0E+04 !Zhiltsova

C59  + C2Cl => C61 + Cl                  8.71E+09   0.5    0.0E+04 !Zhiltsova

C59 + C2  => C61                         4.50E+11   0.5    0.0     !Sojka

C59   + C1 => C60                        4.50E+11   0.5    0.0     !Sojka

C60  + C2Cl2 => C62 + Cl2                8.32E+09   0.5    0.0E+04 !Zhiltsova

C60  + C2Cl => C62 + Cl                  8.71E+09   0.5    0.0E+04 !Zhiltsova

C60 + C2  => C62                         4.50E+11   0.5    0.0     !Sojka

C60   + C1 => C61                        4.50E+11   0.5    0.0     !Sojka

C61   + C1 => C62                        4.50E+12   0.5    0.0     !Sojka

C61  + C2Cl2 => C63 + Cl2                8.32E+09   0.5    0.0E+04 !Zhiltsova

C61  + C2Cl => C63 + Cl                  8.71E+09   0.5    0.0E+04 !Zhiltsova

C61 + C2  => C63                         4.50E+11   0.5    0.0     !Sojka

C62   + C1 => C63                        4.50E+11   0.5    0.0     !Sojka

C62  + C2Cl2 => C64 + Cl2                8.32E+09   0.5    0.0E+04 !Zhiltsova

C62  + C2Cl => C64 + Cl                  8.71E+09   0.5    0.0E+04 !Zhiltsova

C62 + C2  => C64                         4.50E+11   0.5    0.0     !Sojka

C63   + C1 => C64                        4.50E+11   0.5    0.0     !Sojka

C63  + C2Cl2 => C65 + Cl2                8.32E+09   0.5    0.0E+04 !Zhiltsova

C63  + C2Cl => C65 + Cl                  8.71E+09   0.5    0.0E+04 !Zhiltsova

C63 + C2  => C65                         4.50E+11   0.5    0.0     !Sojka

C64   + C1 => C65                        4.50E+11   0.5    0.0     !Sojka

C64  + C2Cl2 => C66 + Cl2                8.32E+09   0.5    0.0E+04 !Zhiltsova

C64  + C2Cl => C66 + Cl                  8.71E+09   0.5    0.0E+04 !Zhiltsova

C64 + C2  => C66                         4.50E+11   0.5    0.0     !Sojka

C65   + C1 => C66                        4.50E+11   0.5    0.0     !Sojka

C65  + C2Cl2 => C67 + Cl2                8.32E+09   0.5    0.0E+04 !Zhiltsova

C65  + C2Cl => C67 + Cl                  8.71E+09   0.5    0.0E+04 !Zhiltsova

C65 + C2  => C67                         4.50E+11   0.5    0.0     !Sojka

C66   + C1 => C67                        4.50E+11   0.5    0.0     !Sojka

C66  + C2Cl2 => C68 + Cl2                8.32E+09   0.5    0.0E+04 !Zhiltsova

C66  + C2Cl => C68 + Cl                  8.71E+09   0.5    0.0E+04 !Zhiltsova

C66 + C2  => C68                         4.50E+11   0.5    0.0     !Sojka

C67   + C1 => C68                        4.50E+11   0.5    0.0     !Sojka

C67  + C2Cl2 => C69 + Cl2                8.32E+09   0.5    0.0E+04 !Zhiltsova

C67  + C2Cl => C69 + Cl                  8.71E+09   0.5    0.0E+04 !Zhiltsova

C67 + C2  => C69                         4.50E+11   0.5    0.0     !Sojka

C68   + C1 => C69                        4.50E+11   0.5    0.0     !Sojka

C68  + C2Cl2 => C70 + Cl2                8.32E+09   0.5    0.0E+04 !Zhiltsova

C68  + C2Cl => C70 + Cl                  8.71E+09   0.5    0.0E+04 !Zhiltsova

C68 + C2  => C70                         4.50E+11   0.5    0.0     !Sojka

C69   + C1 => C70                        4.50E+11   0.5    0.0     !Sojka

C69  + C2Cl2 => C71 + Cl2                8.32E+09   0.5    0.0E+04 !Zhiltsova

C69  + C2Cl => C71 + Cl                  8.71E+09   0.5    0.0E+04 !Zhiltsova

C69 + C2  => C71                         4.50E+11   0.5    0.0     !Sojka

C70   + C1 => C71                        4.50E+11   0.5    0.0     !Sojka

C70  + C2Cl2 => C72 + Cl2                8.32E+09   0.5    0.0E+04 !Zhiltsova

C70  + C2Cl => C72 + Cl                  8.71E+09   0.5    0.0E+04 !Zhiltsova

C70 + C2  => C72                         4.50E+11   0.5    0.0     !Sojka

C71   + C1 => C72                        4.50E+11   0.5    0.0     !Sojka

C71  + C2Cl2 => C73 + Cl2                8.32E+09   0.5    0.0E+04 !Zhiltsova

C71  + C2Cl => C73 + Cl                  8.71E+09   0.5    0.0E+04 !Zhiltsova

C71 + C2  => C73                         4.50E+11   0.5    0.0     !Sojka

C72   + C1 => C73                        4.50E+11   0.5    0.0     !Sojka

C72  + C2Cl2 => C74 + Cl2                8.32E+09   0.5    0.0E+04 !Zhiltsova

C72  + C2Cl => C74 + Cl                  8.71E+09   0.5    0.0E+04 !Zhiltsova

C72 + C2  => C74                         4.50E+11   0.5    0.0     !Sojka

C73   + C1 => C74                        4.50E+11   0.5    0.0     !Sojka

C73  + C2Cl2 => C75 + Cl2                8.32E+09   0.5    0.0E+04 !Zhiltsova

C73  + C2Cl => C75 + Cl                  8.71E+09   0.5    0.0E+04 !Zhiltsova

C73 + C2  => C75                         4.50E+11   0.5    0.0     !Sojka

C74   + C1 => C75                        4.50E+11   0.5    0.0     !Sojka

C74  + C2Cl2 => C76 + Cl2                8.32E+09   0.5    0.0E+04 !Zhiltsova

C74  + C2Cl => C76 + Cl                  8.71E+09   0.5    0.0E+04 !Zhiltsova

C74 + C2  => C76                         4.50E+11   0.5    0.0     !Sojka

C75   + C1 => C76                        4.50E+11   0.5    0.0     !Sojka

C75  + C2Cl2 => C77 + Cl2                8.32E+09   0.5    0.0E+04 !Zhiltsova

C75  + C2Cl => C77 + Cl                  8.71E+09   0.5    0.0E+04 !Zhiltsova

C75 + C2  => C77                         4.50E+11   0.5    0.0     !Sojka

C76   + C1 => C77                        4.50E+11   0.5    0.0     !Sojka

C76  + C2Cl2 => C78 + Cl2                8.32E+09   0.5    0.0E+04 !Zhiltsova

C76  + C2Cl => C78 + Cl                  8.71E+09   0.5    0.0E+04 !Zhiltsova

C76 + C2  => C78                         4.50E+11   0.5    0.0     !Sojka

C77   + C1 => C78                        4.50E+11   0.5    0.0     !Sojka

C77  + C2Cl2 => C79 + Cl2                8.32E+09   0.5    0.0E+04 !Zhiltsova

C77  + C2Cl => C79 + Cl                  8.71E+09   0.5    0.0E+04 !Zhiltsova

C77 + C2  => C79                         4.50E+11   0.5    0.0     !Sojka

C78   + C1 => C79                        4.50E+11   0.5    0.0     !Sojka

C78  + C2Cl2 => C80 + Cl2                8.32E+09   0.5    0.0E+04 !Zhiltsova

C78  + C2Cl => C80 + Cl                  8.71E+09   0.5    0.0E+04 !Zhiltsova

C78 + C2  => C80                         4.50E+11   0.5    0.0     !Sojka

C79   + C1 => C80                        4.50E+11   0.5    0.0     !Sojka

C79  + C2Cl2 => C81 + Cl2                8.32E+09   0.5    0.0E+04 !Zhiltsova

C79  + C2Cl => C81 + Cl                  8.71E+09   0.5    0.0E+04 !Zhiltsova

C79 + C2  => C81                         4.50E+11   0.5    0.0     !Sojka

C80   + C1 => C81                        4.50E+11   0.5    0.0     !Sojka

C80  + C2Cl2 => C82 + Cl2                8.32E+09   0.5    0.0E+04 !Zhiltsova

C80  + C2Cl => C82 + Cl                  8.71E+09   0.5    0.0E+04 !Zhiltsova

C80 + C2  => C82                         4.50E+11   0.5    0.0     !Sojka

C81   + C1 => C82                        4.50E+11   0.5    0.0     !Sojka

C81  + C2Cl2 => C83 + Cl2                8.32E+09   0.5    0.0E+04 !Zhiltsova

C81  + C2Cl => C83 + Cl                  8.71E+09   0.5    0.0E+04 !Zhiltsova

C81 + C2  => C83                         4.50E+11   0.5    0.0     !Sojka

C82   + C1 => C83                        4.50E+11   0.5    0.0     !Sojka

C82  + C2Cl2 => S84 + Cl2                8.32E+09   0.5    0.0E+04 !Zhiltsova

C82  + C2Cl => S84 + Cl                  8.71E+09   0.5    0.0E+04 !Zhiltsova

C82 + C2  => S84                         4.50E+11   0.5    0.0     !Sojka

C83   + C1 => S84                        4.50E+11   0.5    0.0     !Sojka

!************************************************************************

!Precursor coagulation 

!************************************************************************

C31   + C53 => S84                       1.00E+12   0.5    0.0     !Sojka

C32   + C52 => S84                       1.00E+12   0.5    0.0     !Sojka

C33   + C51 => S84                       1.00E+12   0.5    0.0     !Sojka

C34   + C50 => S84                       1.00E+12   0.5    0.0     !Sojka

C35   + C49 => S84                       1.00E+12   0.5    0.0     !Sojka

C36   + C48 => S84                       1.00E+12   0.5    0.0     !Sojka

C37   + C47 => S84                       1.00E+12   0.5    0.0     !Sojka

C38   + C46 => S84                       1.00E+12   0.5    0.0     !Sojka

C39   + C45 => S84                       1.00E+12   0.5    0.0     !Sojka

C40   + C44 => S84                       1.00E+12   0.5    0.0     !Sojka

C41   + C43 => S84                       1.00E+12   0.5    0.0     !Sojka

C42   + C42 => S84                       1.00E+12   0.5    0.0     !Sojka

C31   + C52 => C83                       1.00E+12   0.5    0.0     !Sojka

C32   + C51 => C83                       1.00E+12   0.5    0.0     !Sojka

C33   + C50 => C83                       1.00E+12   0.5    0.0     !Sojka

C34   + C49 => C83                       1.00E+12   0.5    0.0     !Sojka

C35   + C48 => C83                       1.00E+12   0.5    0.0     !Sojka

C36   + C47 => C83                       1.00E+12   0.5    0.0     !Sojka

C37   + C46 => C83                       1.00E+12   0.5    0.0     !Sojka

C38   + C45 => C83                       1.00E+12   0.5    0.0     !Sojka

C39   + C44 => C83                       1.00E+12   0.5    0.0     !Sojka

C40   + C43 => C83                       1.00E+12   0.5    0.0     !Sojka

C41   + C42 => C83                       1.00E+12   0.5    0.0     !Sojka

C31   + C51 => C82                       1.00E+12   0.5    0.0     !Sojka

C32   + C50 => C82                       1.00E+12   0.5    0.0     !Sojka

C33   + C49 => C82                       1.00E+12   0.5    0.0     !Sojka

C34   + C48 => C82                       1.00E+12   0.5    0.0     !Sojka

C35   + C47 => C82                       1.00E+12   0.5    0.0     !Sojka

C36   + C46 => C82                       1.00E+12   0.5    0.0     !Sojka

C37   + C45 => C82                       1.00E+12   0.5    0.0     !Sojka

C38   + C44 => C82                       1.00E+12   0.5    0.0     !Sojka

C39   + C43 => C82                       1.00E+12   0.5    0.0     !Sojka

C40   + C42 => C82                       1.00E+12   0.5    0.0     !Sojka

C41   + C41 => C82                       1.00E+12   0.5    0.0     !Sojka

C31   + C50 => C81                       1.00E+12   0.5    0.0     !Sojka

C32   + C49 => C81                       1.00E+12   0.5    0.0     !Sojka

C33   + C48 => C81                       1.00E+12   0.5    0.0     !Sojka

C34   + C47 => C81                       1.00E+12   0.5    0.0     !Sojka

C35   + C46 => C81                       1.00E+12   0.5    0.0     !Sojka

C36   + C45 => C81                       1.00E+12   0.5    0.0     !Sojka

C37   + C44 => C81                       1.00E+12   0.5    0.0     !Sojka

C38   + C43 => C81                       1.00E+12   0.5    0.0     !Sojka

C39   + C42 => C81                       1.00E+12   0.5    0.0     !Sojka

C40   + C41 => C81                       1.00E+12   0.5    0.0     !Sojka

C31   + C49 => C80                       1.00E+12   0.5    0.0     !Sojka

C32   + C48 => C80                       1.00E+12   0.5    0.0     !Sojka

C33   + C47 => C80                       1.00E+12   0.5    0.0     !Sojka

C34   + C46 => C80                       1.00E+12   0.5    0.0     !Sojka

C35   + C45 => C80                       1.00E+12   0.5    0.0     !Sojka

C36   + C44 => C80                       1.00E+12   0.5    0.0     !Sojka

C37   + C43 => C80                       1.00E+12   0.5    0.0     !Sojka

C38   + C42 => C80                       1.00E+12   0.5    0.0     !Sojka

C39   + C41 => C80                       1.00E+12   0.5    0.0     !Sojka

C40   + C40 => C80                       1.00E+12   0.5    0.0     !Sojka

C31   + C48 => C79                       1.00E+12   0.5    0.0     !Sojka

C32   + C47 => C79                       1.00E+12   0.5    0.0     !Sojka

C33   + C46 => C79                       1.00E+12   0.5    0.0     !Sojka

C34   + C45 => C79                       1.00E+12   0.5    0.0     !Sojka

C35   + C44 => C79                       1.00E+12   0.5    0.0     !Sojka

C36   + C43 => C79                       1.00E+12   0.5    0.0     !Sojka

C37   + C42 => C79                       1.00E+12   0.5    0.0     !Sojka

C38   + C41 => C79                       1.00E+12   0.5    0.0     !Sojka

C39   + C40 => C79                       1.00E+12   0.5    0.0     !Sojka

C31   + C47 => C78                       1.00E+12   0.5    0.0     !Sojka

C32   + C46 => C78                       1.00E+12   0.5    0.0     !Sojka

C33   + C45 => C78                       1.00E+12   0.5    0.0     !Sojka

C34   + C44 => C78                       1.00E+12   0.5    0.0     !Sojka

C35   + C43 => C78                       1.00E+12   0.5    0.0     !Sojka

C36   + C42 => C78                       1.00E+12   0.5    0.0     !Sojka

C37   + C41 => C78                       1.00E+12   0.5    0.0     !Sojka

C38   + C40 => C78                       1.00E+12   0.5    0.0     !Sojka

C39   + C39 => C78                       1.00E+12   0.5    0.0     !Sojka

C31   + C46 => C77                       1.00E+12   0.5    0.0     !Sojka

C32   + C45 => C77                       1.00E+12   0.5    0.0     !Sojka

C33   + C44 => C77                       1.00E+12   0.5    0.0     !Sojka

C34   + C43 => C77                       1.00E+12   0.5    0.0     !Sojka

C35   + C42 => C77                       1.00E+12   0.5    0.0     !Sojka

C36   + C41 => C77                       1.00E+12   0.5    0.0     !Sojka

C37   + C40 => C77                       1.00E+12   0.5    0.0     !Sojka

C38   + C39 => C77                       1.00E+12   0.5    0.0     !Sojka

C31   + C45 => C76                       1.00E+12   0.5    0.0     !Sojka

C32   + C44 => C76                       1.00E+12   0.5    0.0     !Sojka

C33   + C43 => C76                       1.00E+12   0.5    0.0     !Sojka

C34   + C42 => C76                       1.00E+12   0.5    0.0     !Sojka

C35   + C41 => C76                       1.00E+12   0.5    0.0     !Sojka

C36   + C40 => C76                       1.00E+12   0.5    0.0     !Sojka

C37   + C39 => C76                       1.00E+12   0.5    0.0     !Sojka

C38   + C38 => C76                       1.00E+12   0.5    0.0     !Sojka

C31   + C44 => C75                       1.00E+12   0.5    0.0     !Sojka

C32   + C43 => C75                       1.00E+12   0.5    0.0     !Sojka

C33   + C42 => C75                       1.00E+12   0.5    0.0     !Sojka

C34   + C41 => C75                       1.00E+12   0.5    0.0     !Sojka

C35   + C40 => C75                       1.00E+12   0.5    0.0     !Sojka

C36   + C39 => C75                       1.00E+12   0.5    0.0     !Sojka

C37   + C38 => C75                       1.00E+12   0.5    0.0     !Sojka

C31   + C43 => C74                       1.00E+12   0.5    0.0     !Sojka

C32   + C42 => C74                       1.00E+12   0.5    0.0     !Sojka

C33   + C41 => C74                       1.00E+12   0.5    0.0     !Sojka

C34   + C40 => C74                       1.00E+12   0.5    0.0     !Sojka

C35   + C39 => C74                       1.00E+12   0.5    0.0     !Sojka

C36   + C38 => C74                       1.00E+12   0.5    0.0     !Sojka

C37   + C37 => C74                       1.00E+12   0.5    0.0     !Sojka

C31   + C42 => C73                       1.00E+12   0.5    0.0     !Sojka

C32   + C41 => C73                       1.00E+12   0.5    0.0     !Sojka

C33   + C40 => C73                       1.00E+12   0.5    0.0     !Sojka

C34   + C39 => C73                       1.00E+12   0.5    0.0     !Sojka

C35   + C38 => C73                       1.00E+12   0.5    0.0     !Sojka

C36   + C37 => C73                       1.00E+12   0.5    0.0     !Sojka

C31   + C41 => C72                       1.00E+12   0.5    0.0     !Sojka

C32   + C40 => C72                       1.00E+12   0.5    0.0     !Sojka

C33   + C39 => C72                       1.00E+12   0.5    0.0     !Sojka

C34   + C38 => C72                       1.00E+12   0.5    0.0     !Sojka

C35   + C37 => C72                       1.00E+12   0.5    0.0     !Sojka

C36   + C36 => C72                       1.00E+12   0.5    0.0     !Sojka

C31   + C40 => C71                       1.00E+12   0.5    0.0     !Sojka

C32   + C39 => C71                       1.00E+12   0.5    0.0     !Sojka

C33   + C38 => C71                       1.00E+12   0.5    0.0     !Sojka

C34   + C37 => C71                       1.00E+12   0.5    0.0     !Sojka

C35   + C36 => C71                       1.00E+12   0.5    0.0     !Sojka

C31   + C39 => C70                       1.00E+12   0.5    0.0     !Sojka

C32   + C38 => C70                       1.00E+12   0.5    0.0     !Sojka

C33   + C37 => C70                       1.00E+12   0.5    0.0     !Sojka

C34   + C36 => C70                       1.00E+12   0.5    0.0     !Sojka

C35   + C35 => C70                       1.00E+12   0.5    0.0     !Sojka

C31   + C38 => C69                       1.00E+12   0.5    0.0     !Sojka

C32   + C37 => C69                       1.00E+12   0.5    0.0     !Sojka

C33   + C36 => C69                       1.00E+12   0.5    0.0     !Sojka

C34   + C35 => C69                       1.00E+12   0.5    0.0     !Sojka

C31   + C37 => C68                       1.00E+12   0.5    0.0     !Sojka

C32   + C36 => C68                       1.00E+12   0.5    0.0     !Sojka

C33   + C35 => C68                       1.00E+12   0.5    0.0     !Sojka

C34   + C34 => C68                       1.00E+12   0.5    0.0     !Sojka

C31   + C36 => C67                       1.00E+12   0.5    0.0     !Sojka

C32   + C35 => C67                       1.00E+12   0.5    0.0     !Sojka

C33   + C34 => C67                       1.00E+12   0.5    0.0     !Sojka

C31   + C35 => C66                       1.00E+12   0.5    0.0     !Sojka

C32   + C34 => C66                       1.00E+12   0.5    0.0     !Sojka

C33   + C33 => C66                       1.00E+12   0.5    0.0     !Sojka

C31   + C34 => C65                       1.00E+12   0.5    0.0     !Sojka

C32   + C33 => C65                       1.00E+12   0.5    0.0     !Sojka

C31   + C33 => C64                       1.00E+12   0.5    0.0     !Sojka

C32   + C32 => C64                       1.00E+12   0.5    0.0     !Sojka

C31   + C32 => C63                       1.00E+12   0.5    0.0     !Sojka

C31   + C31 => C62                       1.00E+12   0.5    0.0     !Sojka

!************************************************************************

! ***************************************************************************

! References

! ***************************************************************************

! *******************************************************************************

! D.L. Baulch, J. Duxbury, S.J. Grant, D.C. Montague, Phys. Chem. Ref. Data,

! 10: 1-721, 1981.

! S. Dusoleil, P. Goldfinger, A.M. M.-V. d. Auwera, G. Martens, D.V. d. Auwera

! Trans. Faraday Soc. 57: 2197-2209, 1961.

! Garrett: B.C. Garrett, D.G. Truhlar, J. Am. Chem. Soc., 101: 5207-5217, 1979. 

! HB: H. Boehm, estimated.

! HB1: H. Boehm, estimated based on Zhil'sova et al. for C4Cl2

! HB2: H. Boehm, estimated based on Zhilt'sova et al. for C8Cl2

! G. Huvbrechts, I. Thevs, B. Van Meele, Int. J. Chem. Kin, 28: 755-761, 1996.

! Kovacs: T. Kovacs, T. Turanyi, Modelling of the decomposition of CCl4 in thermal plasma,

! in: Proceedings of the 2nd International Meeting in Chemistry. 3-6 June, 2003,

! Santa Clara, Cuba, ISBN 959-250-080-0

! http://garfield.chem.elte.hu/Turanyi/pdf/61_Kovacs_Cuba_2003.pdf 

! and: T. Kovacs, T. Turanyi, K. Foeglein, J. Szepvoelgyi, Plasma Chemistry and Plasma

! Proceedings, 25: 109-119, 2005.

! Kumaran: S.S. Kumaran, M.-C.Su, K.P. Lim, J.V.Michael, S.J. Klippenstein, J. DiFelice,

! P.S. Mudipalli, J.H. Kiefer, D.A. Dixon, K.A. Peterson, Experiments and theory on

! the thermal decomposition of CHCl3 and the reactions of CCl2, J. Phys. Chem. A

! 101: 8653-8661, 1997.

! Kumaran1: S.S. Kumaran, M.-C. Su, K.P. Lim, J.V. Michael, A.F. Wagner, L.B. Harding,

! Ab initio calcualtions on three different applications of unimolcular rate theory

! for the dissociation of CCl4, CFCl3, CF2Cl2, CF3Cl, J. Phys. Chem. 100: 7541-7449, 1996.

! Sojka: J. Sojka, Simulation der Russbildung unter homogenen Verbrennungsbedingungen, 

! PhD, Universitaet Heidelberg, Heidelberg, 2001.

! Won: Y.-.S. Won, J. Ind. Eng. Chem. Vol. 13, No. 3, pp. 400-405, 2007.

! Won1: Y.-S. Won and Bozelli, Combust. Sci. Technol. 85: 345, 1992.

! Zhiltsova: I.V. Zhil'tsova, I.S. Zaslonko, Yu K. Karasevich, H.Gg. Wagner, Kinetics

! of soot formation in tetrachloromethane pyrolysis, Kinetics and Catalysis 41, No. 3: 

! 366-376, 2000.

END
