# Supplementary material for: Experimental investigation and modeling of the kinetics of CCl4 pyrolysis behind reflected shock waves using high-repetition-rate time-of-flight mass spectrometry
Source: Royal Society of Chemistry journal article supplement (doi:10.1039/c2cp42574b), 2013-01-01
Supplement: c2cp42574b_2.dat [file c2cp42574b_2.dat]

THERMO ALL 
298.000 1000.000 5000.000 
AR                L 6/88AR  1    0    0    0G   200.000  6000.000              1
 0.25000000e+01 0.00000000e+00 0.00000000e+00 0.00000000e+00 0.00000000e+00    2
-0.74537500e+03 0.43796749e+01 0.25000000e+01 0.00000000e+00 0.00000000e+00    3
 0.00000000e+00 0.00000000e+00-0.74537500e+03 0.43796749e+01                   4
C1                L 7/88C   1    0    0    0G   200.000  6000.00   1000.0      1
 0.26055830E+01-0.19593434E-03 0.10673722E-06-0.16423940E-10 0.81870580E-15    2
 0.85411742E+05 0.41923868E+01 0.25542395E+01-0.32153772E-03 0.73379223E-06    3
-0.73223487E-09 0.26652144E-12 0.85442681E+05 0.45313085E+01                   4
C2                T05/09C  2.   0.   0.   0.G   200.000  6000.000  1000.0      1
 3.25289233E+00 1.23190307E-03-4.50354156E-07 7.49356656E-11-4.57925077E-15    2
 9.83737348E+04 3.95859964E+00 3.69386038E+00-1.84767427E-03 5.23712984E-06    3
-3.83965401E-09 8.61135711E-13 9.83822318E+04 2.23677006E+00 9.94405213E+04    4
C3                RUS 79C   3    0    0    0G   200.000  6000.000  1000.0      1
 0.48035776E+01 0.21451125E-02-0.10729208E-05 0.26073528E-09-0.20163197E-13    2
 0.99396542E+05 0.38936985E+00 0.54328396E+01-0.44675438E-02 0.14932148E-04    3
-0.14795314E-07 0.50142111E-11 0.99495722E+05-0.15872071E+01                   4
C4                T05/09C  4.   0.   0.   0.G   200.000  6000.000  1000.0      1
 7.40814694E+00 3.01895448E-03-1.14910268E-06 1.92636047E-10-1.18334627E-14    2
 1.24380520E+05-1.40637637E+01 3.68331740E+00 1.73134716E-02-2.61612090E-05    3
 2.24303657E-08-7.80714433E-12 1.25295090E+05 4.41423439E+00 1.26972309E+05    4
C5                g 8/00C   5    0    0    0G   200.000  6000.000              1
 9.57455603E+00 3.86017176E-03-1.47557854E-06 2.48048107E-10-1.52659550E-14    2
 1.23054088E+05-2.37138042E+01 3.35869799E+00 3.24352369E-02-5.93062255E-05    3
 5.60118909E-08-2.03076689E-11 1.24376816E+05 6.04923346E+00                   4
C6                T04/09C  6.   0.   0.   0.G   200.000  6000.000  1000.0      1
 1.06841281E+01 5.62944075E-03-2.13152905E-06 3.56133777E-10-2.18273469E-14    2
 1.43741693E+05-2.87959136E+01 3.06949687E+00 3.71386246E-02-5.95698852E-05    3
 5.15924485E-08-1.77143386E-11 1.45477274E+05 8.35844575E+00 1.47610437E+05    4
C7                A09/04C  7.   0.   0.   0.G   200.000  6000.000              1
 1.26083266E+01 6.67144456E-03-2.52621952E-06 4.22093703E-10-2.58706421E-14    2
 1.54955065E+05-3.71489229E+01 3.38696683E+00 4.56108600E-02-7.47844134E-05    3
 6.56305567E-08-2.26941954E-11 1.57024331E+05 7.67058229E+00                   4
C8                EG8/09C  8.   0.   0.   0.G   200.000  6000.000  1000.0      1
 1.39892773E+01 8.24258701E-03-3.12207319E-06 5.21752007E-10-3.19830408E-14    2
 1.70263611E+05-4.38515149E+01 3.26682054E+00 4.98454175E-02-7.42017112E-05    3
 6.09723820E-08-2.02833487E-11 1.72815481E+05 9.06621258E+00 1.75460306E+05    4
C9                T03/09C  9.   0.   0.   0.G   200.000  6000.000  1000.0      1
 1.54084252E+01 9.71207573E-03-3.66424588E-06 6.10785941E-10-3.73745499E-14    2
 1.82980460E+05-4.92743838E+01 3.10628240E+00 6.31968651E-02-1.05721053E-04    3
 9.44171385E-08-3.29695670E-11 1.85693994E+05 1.02136857E+01 1.88666016E+05    4
C10               EG8/09C 10.   0.   0.   0.G   200.000  6000.000  1000.0      1
 1.73240612E+01 1.08303206E-02-4.10373195E-06 6.85963833E-10-4.20557540E-14    2
 1.68991455E+05-5.88951184E+01 3.73936044E+00 6.13318838E-02-8.66858463E-05    3
 6.86839411E-08-2.23747811E-11 1.72319797E+05 8.65135288E+00 1.75520002E+05    4
C11               EG8/09C 11.   0.   0.   0.G   200.000  6000.000  1000.0      1
 1.87252961E+01 1.23291396E-02-4.66007265E-06 7.77713938E-10-4.76289198E-14    2
 2.08429983E+05-6.50383883E+01 4.06491662E+00 6.56230883E-02-8.94845675E-05    3
 6.89622187E-08-2.20412080E-11 2.12070809E+05 8.12045063E+00 2.15534791E+05    4
C12               T 8/09C 12.   0.   0.   0.G   200.000  6000.000  1000.0      1
 2.07582392E+01 1.33209845E-02-5.04845835E-06 8.43988026E-10-5.17485840E-14    2
 2.22294125E+05-7.44917729E+01 4.11713131E+00 7.44613365E-02-1.03688590E-04    3
 8.11766777E-08-2.62435509E-11 2.26400288E+05 8.41102898E+00 2.30169333E+05    4
C13               G09/04C  13   0.   0.   0.G   200.000  6000.000              1
 2.29543801E+01 1.43501746E-02-5.43744484E-06 9.08902090E-10-5.57238754E-14    2
 2.23913675E+05-7.80360323E+01 4.95465244E+00 8.12647451E-02-1.14858746E-04    3
 9.10062186E-08-2.96465846E-11 2.28323731E+05 1.14630426E+01                   4
C14               G09/04C  14   0.   0.   0.G   200.000  6000.000              1
 2.33874816E+01 1.46209326E-02-5.54003814E-06 9.26051186E-10-5.67752693E-14    2
 2.28138462E+05-7.95084103E+01 5.04813645E+00 8.27980421E-02-1.17025893E-04    3
 9.27233170E-08-3.02059541E-11 2.32631726E+05 1.16793264E+01                   4
C15               G09/04C  15   0.   0.   0.G   200.000  6000.000              1
 2.38205831E+01 1.48916906E-02-5.64263144E-06 9.43200282E-10-5.78266632E-14    2
 2.32363248E+05-8.09807882E+01 5.14162046E+00 8.43313392E-02-1.19193039E-04    3
 9.44404155E-08-3.07653237E-11 2.36939721E+05 1.18956102E+01                   4
C16               G09/04C  16   0.   0.   0.G   200.000  6000.000              1
 2.42536846E+01 1.51624486E-02-5.74522473E-06 9.60349378E-10-5.88780571E-14    2
 2.36588034E+05-8.24531662E+01 5.23510447E+00 8.58646363E-02-1.21360185E-04    3
 9.61575140E-08-3.13246932E-11 2.41247716E+05 1.21118940E+01                   4
C17               G09/04C  17   0.   0.   0.G   200.000  6000.000              1
 2.46867861E+01 1.54332066E-02-5.84781803E-06 9.77498474E-10-5.99294509E-14    2
 2.40812821E+05-8.39255442E+01 5.32858847E+00 8.73979334E-02-1.23527331E-04    3
 9.78746124E-08-3.18840627E-11 2.45555711E+05 1.23281779E+01                   4
C18               G09/04C  18   0.   0.   0.G   200.000  6000.000              1
 2.51198876E+01 1.57039646E-02-5.95041133E-06 9.94647570E-10-6.09808448E-14    2
 2.45037607E+05-8.53979221E+01 5.42207248E+00 8.89312305E-02-1.25694477E-04    3
 9.95917109E-08-3.24434322E-11 2.49863705E+05 1.25444617E+01                   4
C19               G09/04C  19   0.   0.   0.G   200.000  6000.000              1
 2.55529891E+01 1.59747226E-02-6.05300463E-06 1.01179667E-09-6.20322387E-14    2
 2.49262393E+05-8.68703001E+01 5.51555649E+00 9.04645275E-02-1.27861623E-04    3
 1.01308809E-07-3.30028018E-11 2.54171700E+05 1.27607455E+01                   4
C20               G09/04C  20   0.   0.   0.G   200.000  6000.000              1
 2.59860907E+01 1.62454806E-02-6.15559793E-06 1.02894576E-09-6.30836326E-14    2
 2.53487180E+05-8.83426781E+01 5.60904050E+00 9.19978246E-02-1.30028769E-04    3
 1.03025908E-07-3.35621713E-11 2.58479695E+05 1.29770293E+01                   4
C21               G09/04C  21   0.   0.   0.G   200.000  6000.000              1
 2.64191922E+01 1.65162386E-02-6.25819123E-06 1.04609486E-09-6.41350264E-14    2
 2.57711966E+05-8.98150560E+01 5.70252451E+00 9.35311217E-02-1.32195916E-04    3
 1.04743006E-07-3.41215408E-11 2.62787690E+05 1.31933131E+01                   4
C22               G09/04C  22   0.   0.   0.G   200.000  6000.000              1
 2.68522937E+01 1.67869966E-02-6.36078453E-06 1.06324395E-09-6.51864203E-14    2
 2.61936752E+05-9.12874340E+01 5.79600852E+00 9.50644188E-02-1.34363062E-04    3
 1.06460105E-07-3.46809103E-11 2.67095685E+05 1.34095970E+01                   4
C23               G09/04C  23   0.   0.   0.G   200.000  6000.000              1
 2.72853952E+01 1.70577547E-02-6.46337783E-06 1.08039305E-09-6.62378142E-14    2
 2.66161539E+05-9.27598120E+01 5.88949252E+00 9.65977158E-02-1.36530208E-04    3
 1.08177203E-07-3.52402798E-11 2.71403680E+05 1.36258808E+01                   4
C24               G09/04C  24   0.   0.   0.G   200.000  6000.000              1
 2.77184967E+01 1.73285127E-02-6.56597113E-06 1.09754215E-09-6.72892081E-14    2
 2.70386325E+05-9.42321899E+01 5.98297653E+00 9.81310129E-02-1.38697354E-04    3
 1.09894302E-07-3.57996494E-11 2.75711675E+05 1.38421646E+01                   4
C25               G09/04C  25   0.   0.   0.G   200.000  6000.000              1
 2.81515982E+01 1.75992707E-02-6.66856442E-06 1.11469124E-09-6.83406019E-14    2
 2.74611111E+05-9.57045679E+01 6.07646054E+00 9.96643100E-02-1.40864500E-04    3
 1.11611400E-07-3.63590189E-11 2.80019670E+05 1.40584484E+01                   4
C26               G09/04C  26   0.   0.   0.G   200.000  6000.000              1
 2.85846997E+01 1.78700287E-02-6.77115772E-06 1.13184034E-09-6.93919958E-14    2
 2.78835898E+05-9.71769459E+01 6.16994455E+00 1.01197607E-01-1.43031646E-04    3
 1.13328499E-07-3.69183884E-11 2.84327665E+05 1.42747323E+01                   4
C27               G09/04C  27   0.   0.   0.G   200.000  6000.000              1
 2.90178012E+01 1.81407867E-02-6.87375102E-06 1.14898943E-09-7.04433897E-14    2
 2.83060684E+05-9.86493238E+01 6.26342856E+00 1.02730904E-01-1.45198793E-04    3
 1.15045597E-07-3.74777579E-11 2.88635660E+05 1.44910161E+01                   4
C28               G09/04C  28   0.   0.   0.G   200.000  6000.000              1
 2.94509027E+01 1.84115447E-02-6.97634432E-06 1.16613853E-09-7.14947836E-14    2
 2.87285470E+05-1.00121702E+02 6.35691257E+00 1.04264201E-01-1.47365939E-04    3
 1.16762696E-07-3.80371274E-11 2.92943655E+05 1.47072999E+01                   4
C29               G09/04C  29   0.   0.   0.G   200.000  6000.000              1
 2.98840043E+01 1.86823027E-02-7.07893762E-06 1.18328763E-09-7.25461774E-14    2
 2.91510257E+05-1.01594080E+02 6.45039657E+00 1.05797498E-01-1.49533085E-04    3
 1.18479794E-07-3.85964970E-11 2.97251650E+05 1.49235837E+01                   4
C30               G09/04C  30   0.   0.   0.G   200.000  6000.000              1
 3.03171058E+01 1.89530607E-02-7.18153092E-06 1.20043672E-09-7.35975713E-14    2
 2.95735043E+05-1.03066458E+02 6.54388058E+00 1.07330795E-01-1.51700231E-04    3
 1.20196892E-07-3.91558665E-11 3.01559645E+05 1.51398675E+01                   4
C31               G09/04C  31   0.   0.   0.G   200.000  6000.000              1
 3.07502073E+01 1.92238187E-02-7.28412422E-06 1.21758582E-09-7.46489652E-14    2
 2.99959829E+05-1.04538836E+02 6.63736459E+00 1.08864092E-01-1.53867377E-04    3
 1.21913991E-07-3.97152360E-11 3.05867639E+05 1.53561514E+01                   4
C32               G09/04C  32   0.   0.   0.G   200.000  6000.000              1
 3.11833088E+01 1.94945768E-02-7.38671752E-06 1.23473491E-09-7.57003591E-14    2
 3.04184616E+05-1.06011214E+02 6.73084860E+00 1.10397390E-01-1.56034523E-04    3
 1.23631089E-07-4.02746055E-11 3.10175634E+05 1.55724352E+01                   4
C33               G09/04C  33   0.   0.   0.G   200.000  6000.000              1
 3.16164103E+01 1.97653348E-02-7.48931081E-06 1.25188401E-09-7.67517529E-14    2
 3.08409402E+05-1.07483592E+02 6.82433261E+00 1.11930687E-01-1.58201670E-04    3
 1.25348188E-07-4.08339750E-11 3.14483629E+05 1.57887190E+01                   4
C34               G09/04C  34   0.   0.   0.G   200.000  6000.000              1
 3.20495118E+01 2.00360928E-02-7.59190411E-06 1.26903311E-09-7.78031468E-14    2
 3.12634188E+05-1.08955970E+02 6.91781662E+00 1.13463984E-01-1.60368816E-04    3
 1.27065286E-07-4.13933446E-11 3.18791624E+05 1.60050028E+01                   4
C35               G09/04C  35   0.   0.   0.G   200.000  6000.000              1
 3.24826133E+01 2.03068508E-02-7.69449741E-06 1.28618220E-09-7.88545407E-14    2
 3.16858975E+05-1.10428348E+02 7.01130062E+00 1.14997281E-01-1.62535962E-04    3
 1.28782385E-07-4.19527141E-11 3.23099619E+05 1.62212867E+01                   4
C36               G09/04C  36   0.   0.   0.G   200.000  6000.000              1
 3.29157148E+01 2.05776088E-02-7.79709071E-06 1.30333130E-09-7.99059346E-14    2
 3.21083761E+05-1.11900726E+02 7.10478463E+00 1.16530578E-01-1.64703108E-04    3
 1.30499483E-07-4.25120836E-11 3.27407614E+05 1.64375705E+01                   4
C37               G09/04C  37   0.   0.   0.G   200.000  6000.000              1
 3.33488163E+01 2.08483668E-02-7.89968401E-06 1.32048039E-09-8.09573284E-14    2
 3.25308547E+05-1.13373104E+02 7.19826864E+00 1.18063875E-01-1.66870254E-04    3
 1.32216582E-07-4.30714531E-11 3.31715609E+05 1.66538543E+01                   4
C38               G09/04C  38   0.   0.   0.G   200.000  6000.000              1
 3.37819179E+01 2.11191248E-02-8.00227731E-06 1.33762949E-09-8.20087223E-14    2
 3.29533334E+05-1.14845481E+02 7.29175265E+00 1.19597172E-01-1.69037400E-04    3
 1.33933680E-07-4.36308227E-11 3.36023604E+05 1.68701381E+01                   4
C39               G09/04C  39   0.   0.   0.G   200.000  6000.000              1
 3.42150194E+01 2.13898828E-02-8.10487061E-06 1.35477859E-09-8.30601162E-14    2
 3.33758120E+05-1.16317859E+02 7.38523666E+00 1.21130469E-01-1.71204546E-04    3
 1.35650779E-07-4.41901922E-11 3.40331599E+05 1.70864219E+01                   4
C40               G09/04C  40   0.   0.   0.G   200.000  6000.000              1
 3.46481209E+01 2.16606408E-02-8.20746391E-06 1.37192768E-09-8.41115101E-14    2
 3.37982906E+05-1.17790237E+02 7.47872066E+00 1.22663766E-01-1.73371693E-04    3
 1.37367877E-07-4.47495617E-11 3.44639594E+05 1.73027058E+01                   4
C41               G09/04C  41   0.   0.   0.G   200.000  6000.000              1
 3.50812224E+01 2.19313988E-02-8.31005721E-06 1.38907678E-09-8.51629040E-14    2
 3.42207693E+05-1.19262615E+02 7.57220467E+00 1.24197063E-01-1.75538839E-04    3
 1.39084976E-07-4.53089312E-11 3.48947589E+05 1.75189896E+01                   4
C42               G09/04C  42   0.   0.   0.G   200.000  6000.000              1
 3.55143239E+01 2.22021569E-02-8.41265050E-06 1.40622587E-09-8.62142978E-14    2
 3.46432479E+05-1.20734993E+02 7.66568868E+00 1.25730360E-01-1.77705985E-04    3
 1.40802074E-07-4.58683007E-11 3.53255584E+05 1.77352734E+01                   4
C43               G09/04C  43   0.   0.   0.G   200.000  6000.000              1
 3.59474254E+01 2.24729149E-02-8.51524380E-06 1.42337497E-09-8.72656917E-14    2
 3.50657265E+05-1.22207371E+02 7.75917269E+00 1.27263657E-01-1.79873131E-04    3
 1.42519172E-07-4.64276703E-11 3.57563579E+05 1.79515572E+01                   4
C44               G09/04C  44   0.   0.   0.G   200.000  6000.000              1
 3.63805269E+01 2.27436729E-02-8.61783710E-06 1.44052407E-09-8.83170856E-14    2
 3.54882052E+05-1.23679749E+02 7.85265670E+00 1.28796954E-01-1.82040277E-04    3
 1.44236271E-07-4.69870398E-11 3.61871573E+05 1.81678411E+01                   4
C45               G09/04C  45   0.   0.   0.G   200.000  6000.000              1
 3.68136284E+01 2.30144309E-02-8.72043040E-06 1.45767316E-09-8.93684795E-14    2
 3.59106838E+05-1.25152127E+02 7.94614071E+00 1.30330252E-01-1.84207423E-04    3
 1.45953369E-07-4.75464093E-11 3.66179568E+05 1.83841249E+01                   4
C46               G09/04C  46   0.   0.   0.G   200.000  6000.000              1
 3.72467299E+01 2.32851889E-02-8.82302370E-06 1.47482226E-09-9.04198733E-14    2
 3.63331624E+05-1.26624505E+02 8.03962471E+00 1.31863549E-01-1.86374570E-04    3
 1.47670468E-07-4.81057788E-11 3.70487563E+05 1.86004087E+01                   4
C47               G09/04C  47   0.   0.   0.G   200.000  6000.000              1
 3.76798315E+01 2.35559469E-02-8.92561700E-06 1.49197135E-09-9.14712672E-14    2
 3.67556411E+05-1.28096883E+02 8.13310872E+00 1.33396846E-01-1.88541716E-04    3
 1.49387566E-07-4.86651483E-11 3.74795558E+05 1.88166925E+01                   4
C48               G09/04C  48   0.   0.   0.G   200.000  6000.000              1
 3.81129330E+01 2.38267049E-02-9.02821030E-06 1.50912045E-09-9.25226611E-14    2
 3.71781197E+05-1.29569261E+02 8.22659273E+00 1.34930143E-01-1.90708862E-04    3
 1.51104665E-07-4.92245179E-11 3.79103553E+05 1.90329763E+01                   4
C49               G09/04C  49   0.   0.   0.G   200.000  6000.000              1
 3.85460345E+01 2.40974629E-02-9.13080360E-06 1.52626955E-09-9.35740550E-14    2
 3.76005983E+05-1.31041639E+02 8.32007674E+00 1.36463440E-01-1.92876008E-04    3
 1.52821763E-07-4.97838874E-11 3.83411548E+05 1.92492602E+01                   4
C50               G09/04C  50   0.   0.   0.G   200.000  6000.000              1
 3.89791360E+01 2.43682209E-02-9.23339690E-06 1.54341864E-09-9.46254488E-14    2
 3.80230770E+05-1.32514017E+02 8.41356075E+00 1.37996737E-01-1.95043154E-04    3
 1.54538862E-07-5.03432569E-11 3.87719543E+05 1.94655440E+01                   4
C51               G09/04C  51   0.   0.   0.G   200.000  6000.000              1
 3.94122375E+01 2.46389790E-02-9.33599019E-06 1.56056774E-09-9.56768427E-14    2
 3.84455556E+05-1.33986395E+02 8.50704476E+00 1.39530034E-01-1.97210300E-04    3
 1.56255960E-07-5.09026264E-11 3.92027538E+05 1.96818278E+01                   4
C52               G09/04C  52   0.   0.   0.G   200.000  6000.000              1
 3.98453390E+01 2.49097370E-02-9.43858349E-06 1.57771683E-09-9.67282366E-14    2
 3.88680342E+05-1.35458773E+02 8.60052876E+00 1.41063331E-01-1.99377447E-04    3
 1.57973059E-07-5.14619959E-11 3.96335533E+05 1.98981116E+01                   4
C53               G09/04C  53   0.   0.   0.G   200.000  6000.000              1
 4.02784405E+01 2.51804950E-02-9.54117679E-06 1.59486593E-09-9.77796305E-14    2
 3.92905129E+05-1.36931151E+02 8.69401277E+00 1.42596628E-01-2.01544593E-04    3
 1.59690157E-07-5.20213655E-11 4.00643528E+05 2.01143955E+01                   4
C54               G09/04C  54   0.   0.   0.G   200.000  6000.000              1
 4.07115420E+01 2.54512530E-02-9.64377009E-06 1.61201503E-09-9.88310243E-14    2
 3.97129915E+05-1.38403529E+02 8.78749678E+00 1.44129925E-01-2.03711739E-04    3
 1.61407256E-07-5.25807350E-11 4.04951523E+05 2.03306793E+01                   4
C55               G09/04C  55   0.   0.   0.G   200.000  6000.000              1
 4.11446435E+01 2.57220110E-02-9.74636339E-06 1.62916412E-09-9.98824182E-14    2
 4.01354701E+05-1.39875907E+02 8.88098079E+00 1.45663222E-01-2.05878885E-04    3
 1.63124354E-07-5.31401045E-11 4.09259518E+05 2.05469631E+01                   4
C56               G09/04C  56   0.   0.   0.G   200.000  6000.000              1
 4.15777451E+01 2.59927690E-02-9.84895669E-06 1.64631322E-09-1.00933812E-13    2
 4.05579487E+05-1.41348285E+02 8.97446480E+00 1.47196519E-01-2.08046031E-04    3
 1.64841452E-07-5.36994740E-11 4.13567513E+05 2.07632469E+01                   4
C57               G09/04C  57   0.   0.   0.G   200.000  6000.000              1
 4.20108466E+01 2.62635270E-02-9.95154999E-06 1.66346232E-09-1.01985206E-13    2
 4.09804274E+05-1.42820663E+02 9.06794881E+00 1.48729816E-01-2.10213177E-04    3
 1.66558551E-07-5.42588436E-11 4.17875507E+05 2.09795307E+01                   4
C58               G09/04C  58   0.   0.   0.G   200.000  6000.000              1
 4.24439481E+01 2.65342850E-02-1.00541433E-05 1.68061141E-09-1.03036600E-13    2
 4.14029060E+05-1.44293041E+02 9.16143281E+00 1.50263114E-01-2.12380324E-04    3
 1.68275649E-07-5.48182131E-11 4.22183502E+05 2.11958146E+01                   4
C59               G09/04C  59   0.   0.   0.G   200.000  6000.000              1
 4.28770496E+01 2.68050430E-02-1.01567366E-05 1.69776051E-09-1.04087994E-13    2
 4.18253846E+05-1.45765419E+02 9.25491682E+00 1.51796411E-01-2.14547470E-04    3
 1.69992748E-07-5.53775826E-11 4.26491497E+05 2.14120984E+01                   4
C60               G09/04C  60   0.   0.   0.G   200.000  6000.000              1
 4.33101511E+01 2.70758010E-02-1.02593299E-05 1.71490960E-09-1.05139388E-13    2
 4.22478633E+05-1.47237797E+02 9.34840083E+00 1.53329708E-01-2.16714616E-04    3
 1.71709846E-07-5.59369521E-11 4.30799492E+05 2.16283822E+01                   4
C61               G09/04C  61   0.   0.   0.G   200.000  6000.000              1
 4.37432526E+01 2.73465591E-02-1.03619232E-05 1.73205870E-09-1.06190781E-13    2
 4.26703419E+05-1.48710175E+02 9.44188484E+00 1.54863005E-01-2.18881762E-04    3
 1.73426945E-07-5.64963216E-11 4.35107487E+05 2.18446660E+01                   4
C62               G09/04C  62   0.   0.   0.G   200.000  6000.000              1
 4.41763541E+01 2.76173171E-02-1.04645165E-05 1.74920780E-09-1.07242175E-13    2
 4.30928205E+05-1.50182553E+02 9.53536885E+00 1.56396302E-01-2.21048908E-04    3
 1.75144043E-07-5.70556912E-11 4.39415482E+05 2.20609499E+01                   4
C63               G09/04C  63   0.   0.   0.G   200.000  6000.000              1
 4.46094556E+01 2.78880751E-02-1.05671098E-05 1.76635689E-09-1.08293569E-13    2
 4.35152992E+05-1.51654931E+02 9.62885286E+00 1.57929599E-01-2.23216054E-04    3
 1.76861142E-07-5.76150607E-11 4.43723477E+05 2.22772337E+01                   4
C64               G09/04C  64   0.   0.   0.G   200.000  6000.000              1
 4.50425571E+01 2.81588331E-02-1.06697031E-05 1.78350599E-09-1.09344963E-13    2
 4.39377778E+05-1.53127309E+02 9.72233686E+00 1.59462896E-01-2.25383200E-04    3
 1.78578240E-07-5.81744302E-11 4.48031472E+05 2.24935175E+01                   4
C65               G09/04C  65   0.   0.   0.G   200.000  6000.000              1
 4.54756587E+01 2.84295911E-02-1.07722964E-05 1.80065508E-09-1.10396357E-13    2
 4.43602564E+05-1.54599687E+02 9.81582087E+00 1.60996193E-01-2.27550347E-04    3
 1.80295339E-07-5.87337997E-11 4.52339467E+05 2.27098013E+01                   4
C66               G09/04C  66   0.   0.   0.G   200.000  6000.000              1
 4.59087602E+01 2.87003491E-02-1.08748897E-05 1.81780418E-09-1.11447751E-13    2
 4.47827351E+05-1.56072065E+02 9.90930488E+00 1.62529490E-01-2.29717493E-04    3
 1.82012437E-07-5.92931692E-11 4.56647462E+05 2.29260851E+01                   4
C67               G09/04C  67   0.   0.   0.G   200.000  6000.000              1
 4.63418617E+01 2.89711071E-02-1.09774830E-05 1.83495328E-09-1.12499145E-13    2
 4.52052137E+05-1.57544443E+02 1.00027889E+01 1.64062787E-01-2.31884639E-04    3
 1.83729536E-07-5.98525388E-11 4.60955457E+05 2.31423690E+01                   4
C68               G09/04C  68   0.   0.   0.G   200.000  6000.000              1
 4.67749632E+01 2.92418651E-02-1.10800763E-05 1.85210237E-09-1.13550539E-13    2
 4.56276923E+05-1.59016821E+02 1.00962729E+01 1.65596084E-01-2.34051785E-04    3
 1.85446634E-07-6.04119083E-11 4.65263452E+05 2.33586528E+01                   4
C69               G09/04C  69   0.   0.   0.G   200.000  6000.000              1
 4.72080647E+01 2.95126231E-02-1.11826696E-05 1.86925147E-09-1.14601932E-13    2
 4.60501710E+05-1.60489198E+02 1.01897569E+01 1.67129381E-01-2.36218931E-04    3
 1.87163733E-07-6.09712778E-11 4.69571446E+05 2.35749366E+01                   4
C70               G09/04C  70   0.   0.   0.G   200.000  6000.000              1
 4.76411662E+01 2.97833811E-02-1.12852629E-05 1.88640056E-09-1.15653326E-13    2
 4.64726496E+05-1.61961576E+02 1.02832409E+01 1.68662678E-01-2.38386077E-04    3
 1.88880831E-07-6.15306473E-11 4.73879441E+05 2.37912204E+01                   4
C71               G09/04C  71   0.   0.   0.G   200.000  6000.000              1
 4.80742677E+01 3.00541392E-02-1.13878562E-05 1.90354966E-09-1.16704720E-13    2
 4.68951282E+05-1.63433954E+02 1.03767249E+01 1.70195976E-01-2.40553224E-04    3
 1.90597929E-07-6.20900169E-11 4.78187436E+05 2.40075042E+01                   4
C72               G09/04C  72   0.   0.   0.G   200.000  6000.000              1
 4.85073692E+01 3.03248972E-02-1.14904495E-05 1.92069876E-09-1.17756114E-13    2
 4.73176069E+05-1.64906332E+02 1.04702089E+01 1.71729273E-01-2.42720370E-04    3
 1.92315028E-07-6.26493864E-11 4.82495431E+05 2.42237881E+01                   4
C73               G09/04C  73   0.   0.   0.G   200.000  6000.000              1
 4.89404707E+01 3.05956552E-02-1.15930428E-05 1.93784785E-09-1.18807508E-13    2
 4.77400855E+05-1.66378710E+02 1.05636929E+01 1.73262570E-01-2.44887516E-04    3
 1.94032126E-07-6.32087559E-11 4.86803426E+05 2.44400719E+01                   4
C74               G09/04C  74   0.   0.   0.G   200.000  6000.000              1
 4.93735723E+01 3.08664132E-02-1.16956361E-05 1.95499695E-09-1.19858902E-13    2
 4.81625641E+05-1.67851088E+02 1.06571769E+01 1.74795867E-01-2.47054662E-04    3
 1.95749225E-07-6.37681254E-11 4.91111421E+05 2.46563557E+01                   4
C75               G09/04C  75   0.   0.   0.G   200.000  6000.000              1
 4.98066738E+01 3.11371712E-02-1.17982294E-05 1.97214604E-09-1.20910296E-13    2
 4.85850428E+05-1.69323466E+02 1.07506610E+01 1.76329164E-01-2.49221808E-04    3
 1.97466323E-07-6.43274949E-11 4.95419416E+05 2.48726395E+01                   4
C76               G09/04C  76   0.   0.   0.G   200.000  6000.000              1
 5.02397753E+01 3.14079292E-02-1.19008227E-05 1.98929514E-09-1.21961690E-13    2
 4.90075214E+05-1.70795844E+02 1.08441450E+01 1.77862461E-01-2.51388954E-04    3
 1.99183422E-07-6.48868645E-11 4.99727411E+05 2.50889234E+01                   4
C77               G09/04C  77   0.   0.   0.G   200.000  6000.000              1
 5.06728768E+01 3.16786872E-02-1.20034160E-05 2.00644424E-09-1.23013083E-13    2
 4.94300000E+05-1.72268222E+02 1.09376290E+01 1.79395758E-01-2.53556101E-04    3
 2.00900520E-07-6.54462340E-11 5.04035406E+05 2.53052072E+01                   4
C78               G09/04C  78   0.   0.   0.G   200.000  6000.000              1
 5.11059783E+01 3.19494452E-02-1.21060093E-05 2.02359333E-09-1.24064477E-13    2
 4.98524787E+05-1.73740600E+02 1.10311130E+01 1.80929055E-01-2.55723247E-04    3
 2.02617619E-07-6.60056035E-11 5.08343401E+05 2.55214910E+01                   4
C79               G09/04C  79   0.   0.   0.G   200.000  6000.000              1
 5.15390798E+01 3.22202032E-02-1.22086026E-05 2.04074243E-09-1.25115871E-13    2
 5.02749573E+05-1.75212978E+02 1.11245970E+01 1.82462352E-01-2.57890393E-04    3
 2.04334717E-07-6.65649730E-11 5.12651396E+05 2.57377748E+01                   4
C80               G09/04C  80   0.   0.   0.G   200.000  6000.000              1
 5.19721813E+01 3.24909613E-02-1.23111959E-05 2.05789152E-09-1.26167265E-13    2
 5.06974359E+05-1.76685356E+02 1.12180810E+01 1.83995649E-01-2.60057539E-04    3
 2.06051816E-07-6.71243425E-11 5.16959391E+05 2.59540586E+01                   4
C81               G09/04C  81   0.   0.   0.G   200.000  6000.000              1
 5.24052828E+01 3.27617193E-02-1.24137892E-05 2.07504062E-09-1.27218659E-13    2
 5.11199146E+05-1.78157734E+02 1.13115650E+01 1.85528946E-01-2.62224685E-04    3
 2.07768914E-07-6.76837121E-11 5.21267386E+05 2.61703425E+01                   4
C82               G09/04C  82   0.   0.   0.G   200.000  6000.000              1
 5.28383843E+01 3.30324773E-02-1.25163825E-05 2.09218972E-09-1.28270053E-13    2
 5.15423932E+05-1.79630112E+02 1.14050490E+01 1.87062243E-01-2.64391831E-04    3
 2.09486013E-07-6.82430816E-11 5.25575380E+05 2.63866263E+01                   4
C83               G09/04C  83   0.   0.   0.G   200.000  6000.000              1
 5.32714859E+01 3.33032353E-02-1.26189758E-05 2.10933881E-09-1.29321447E-13    2
 5.19648718E+05-1.81102490E+02 1.14985330E+01 1.88595540E-01-2.66558977E-04    3
 2.11203111E-07-6.88024511E-11 5.29883375E+05 2.66029101E+01                   4
AR                L 6/88AR  1    0    0    0G   200.000  6000.000              1
 0.25000000e+01 0.00000000e+00 0.00000000e+00 0.00000000e+00 0.00000000e+00    2
-0.74537500e+03 0.43796749e+01 0.25000000e+01 0.00000000e+00 0.00000000e+00    3
 0.00000000e+00 0.00000000e+00-0.74537500e+03 0.43796749e+01                   4
N2                RUS 78N   2    0    0    0G   200.000  6000.000              1
 0.29525407e+01 0.13968838e-02-0.49262577e-06 0.78600091e-10-0.46074978e-14    2
-0.92393753e+03 0.58718221e+01 0.35309628e+01-0.12365950e-03-0.50299339e-06    3
 0.24352768e-08-0.14087954e-11-0.10469637e+04 0.29674391e+01                   4
C4Cl2             A04/05C  4.Cl 2.   0.   0.G   200.000  6000.000              1
 1.17620201E+01 4.49306295E-03-1.68019233E-06 2.78485278E-10-1.69756991E-14    2
 5.05450809E+04-3.06261220E+01 3.66699045E+00 4.35315160E-02-7.95853289E-05    3
 7.22522258E-08-2.50290031E-11 5.20982332E+04 7.46823673E+00 5.45542220E+04    4
C4Cl3             U05/78C   4Cl  3O   0N   0G   300.000  5000.000              1
 0.13922000E+02 0.44197999E-02-0.18001000E-05 0.80162998E-09-0.12411001E-12    2
 0.46723000E+05-0.35244999E+02 0.73006001E+01 0.25769999E-01-0.27650000E-04    3
 0.15944000E-07-0.41957002E-11 0.47948000E+05-0.28622999E+01                   4
C4Cl4             U05/78C   4Cl  4O   0N   0G   300.000  5000.000              1
 0.27440001E+02-0.89587003E-01 0.24793000E-03-0.26454001E-06 0.98600003E-10    2
 0.17451000E+05-0.91526001E+02-0.13443000E+02 0.21363001E+00-0.57825999E-03    3
 0.71494998E-06-0.32726999E-09 0.21727000E+05 0.79915001E+02                   4
C4Cl5             U05/78C   4Cl  5O   0N   0G   300.000  5000.000              1
 0.18955000E+02 0.38127000E-02-0.15954000E-05 0.83717000E-09-0.15796000E-12    2
 0.16046000E+05-0.54279999E+02 0.14299000E+02 0.49174000E-02 0.25007001E-04    3
-0.38601002E-07 0.16783000E-10 0.17220000E+05-0.28952000E+02                   4
C4Cl6             A04/05C  4.Cl 6.   0.   0.G   200.000  6000.000              1
  .18784760E+02  .22229510E-03 -.20433270E-06  .47102190E-10 -.37746830E-14    2
 -.72539610E+04 -.48489490E+02  .14991330E+02  .76409690E-02 -.39209000E-05    3
  .20097110E-09 -.71200650E-13 -.59560030E+04 -.27880290E+02                   4
C6Cl2             A04/05C  6.Cl 2.   0.   0.G   200.000  6000.000              1
  .19769880E+02  .27843980E-03 -.25646170E-06  .57868340E-10 -.46443050E-14    2
  .68749220E+05 -.70311080E+02  .94458660E+01  .19896460E-01 -.89963770E-05    3
 -.78645110E-09  .27746100E-12  .72332180E+05 -.14032460E+02                   4
C6Cl5             U05/78C   6Cl  5O   0N   0G   300.000  5000.000              1
 0.26181000E+02 0.20140000E-02-0.56534999E-17 0.47323001E-21-0.22866001E-24    2
 0.18793000E+05-0.94827003E+02-0.10070000E+01 0.11018000E+00-0.17328000E-03    3
 0.13426001E-06-0.41957000E-10 0.23376000E+05 0.34425999E+02                   4
C6Cl6             T 1/08C  6.Cl 6.   0.   0.G   200.000  6000.000              1
 2.55228003E+01 8.59999925E-03-3.34909283E-06 5.69712135E-10-3.53459693E-14    2
-1.44207496E+04-9.81782282E+01 3.81595588E+00 8.54917360E-02-1.15028827E-04    3
 7.95785528E-08-2.25493448E-11-9.18260595E+03 1.00076905E+01-5.11469419E+03    4
C8Cl2             A04/05C  8.Cl 2.   0.   0.G   200.000  6000.000              1
  .24904660E+02  .72868750E-03 -.65015440E-06  .14405170E-09 -.11657050E-13    2
  .95901800E+05 -.94218130E+02  .11757300E+02  .25901830E-01 -.11947070E-04    3
 -.95147020E-09  .33629060E-12  .10043250E+06 -.22645890E+02                   4
C10Cl2            A04/05C 10.Cl 2.   0.   0.G   200.000  6000.000              1
  .29987910E+02  .12705030E-02 -.10950210E-05  .24082090E-09 -.19641520E-13    2
  .12307470E+06 -.11783860E+03  .14084940E+02  .31796880E-01 -.14637630E-04    3
 -.13718380E-08  .48417110E-12  .12853110E+06 -.31328250E+02                   4
C12Cl2            A04/05C 12.Cl 2.   0.   0.G   200.000  6000.000              1
  .35128480E+02  .17107440E-02 -.14791760E-05  .32257840E-09 -.26471100E-13    2
  .15022430E+06 -.14177930E+03  .16459790E+02  .37363690E-01 -.16538900E-04    3
 -.25798270E-08  .91046270E-12  .15662460E+06 -.40210390E+02                   4
CCl4              tpis91C  1.Cl 4.   0.   0.G   200.000  6000.000              1
 1.16219486E+01 1.43587698E-03-5.68084026E-07 9.76193732E-11-6.09835495E-15    2
-1.53554331E+04-3.02030041E+01 2.19698663E+00 4.41047270E-02-7.81537067E-05    3
 6.55173998E-08-2.10841442E-11-1.35423579E+04 1.44892060E+01-1.14979716E+04    4
CCl3 Radicals     S09/01C  1.Cl 3.   0.   0.G   200.000  6000.000              1
 8.86167674E+00 1.18055486E-03-4.65765318E-07 7.98915627E-11-4.98464418E-15    2
 5.60193095E+03-1.57461775E+01 2.66358332E+00 2.71296370E-02-4.42402957E-05    3
 3.46851463E-08-1.05866977E-11 6.88202237E+03 1.41172615E+01 8.55468332E+03    4
CCl2              IU3/03C  1.Cl 2.   0.   0.G   200.000  6000.000              1
 0.80836736E+01-0.11686005E-02 0.47029320E-06-0.81695078E-10 0.51447645E-14    2
 0.25307376E+05-0.14232761E+02 0.96645165E+00 0.26370954E-01-0.34655778E-04    3
 0.14693679E-07-0.66489549E-13 0.26683995E+05 0.20047532E+02 0.27867073E+05    4
CCl               g 8/99C  1.Cl 1.   0.   0.G   200.000  6000.000              1
 4.17004432E+00 3.81512193E-04-1.31550106E-07 2.76232662E-11-2.22142338E-15    2
 5.06890146E+04 2.94940729E+00 3.76699432E+00-1.49297520E-03 9.61147378E-06    3
-1.27137798E-08 5.27369513E-12 5.09118011E+04 5.66470872E+00 5.20308543E+04    4
C2Cl6             A 4/05C  2.Cl 6.   0.   0.G   200.000  6000.000              1
 1.88630387E+01 3.24136618E-03-1.36977241E-06 2.36702848E-10-1.46489708E-14    2
-2.57902776E+04-6.06433678E+01 3.83016650E+00 6.99619400E-02-1.19578126E-04    3
 9.72583947E-08-3.05156890E-11-2.28701227E+04 1.08683334E+01-1.94972404E+04    4
C2Cl5             RUS79 C   2Cl  5    0    0G   200.000  6000.000              1
 0.17153955E+02 0.13960259E-02-0.64226587E-06 0.11840383E-09-0.76901280E-14    2
-0.10091822E+04-0.51540891E+02 0.29430292E+01 0.63377422E-01-0.10845541E-03    3
 0.87020632E-07-0.26867241E-10 0.17951146E+04 0.16297364E+02 0.46905951E+04    4
C2Cl4             T05/08C  2.Cl 4.   0.   0.G   200.000  6000.000              1
 1.32027522E+01 2.84270302E-03-1.10833520E-06 1.88694352E-10-1.17139630E-14    2
-7.05586076E+03-3.60905501E+01 3.11949409E+00 4.49195301E-02-7.36240531E-05    3
 5.96895418E-08-1.89904125E-11-4.91858238E+03 1.26542200E+01-2.53344430E+03    4
C2Cl3             RUS 79C   2Cl  3    0    0G   200.000  6000.000              1
 0.10595050E+02 0.24399967E-02-0.95037713E-06 0.16169666E-09-0.10033459E-13    2
 0.19234142E+05-0.22503828E+02 0.26913275E+01 0.34419583E-01-0.54507749E-04    3
 0.43131421E-07-0.13498250E-10 0.20955741E+05 0.15941066E+02 0.22885293E+05    4
C2Cl2             TT8/03C   2Cl  20   00   0G   300.000  5000.000              1
 0.81728547E 01 0.23659892E-02-0.96552505E-06 0.17736148E-09-0.12135203E-13    2
 0.24554808E 05-0.14916744E 02 0.50229482E 01 0.14082667E-01-0.18095669E-04    3
 0.11610348E-07-0.28817478E-11 0.25272100E 05 0.59684170E 00 0.27253560E+05    4
C2Cl              RUS 79C   2Cl  1    0    0G   200.000  6000.000              1
 0.56234123E+01 0.18105201E-02-0.68417616E-06 0.11416613E-09-0.69911780E-14    2
 0.57535699E+05-0.37681711E+01 0.25669685E+01 0.16082406E-01-0.28879777E-04    3
 0.26238319E-07-0.91509851E-11 0.58152495E+05 0.10748857E+02 0.59425029E+05    4
Cl                J 6/82Cl 1.   0.   0.   0.G   200.000  6000.000              1
 2.94658358E+00-3.85985408E-04 1.36139388E-07-2.17032923E-11 1.28751025E-15    2
 1.36970327E+04 3.11330136E+00 2.26062480E+00 1.54154399E-03-6.80283622E-07    3
-1.59972975E-09 1.15416636E-12 1.38552986E+04 6.57020799E+00 1.45891941E+04    4
Cl2  REF ELEMENT  G 8/02Cl 2.   0.   0.   0.G   200.000  6000.000              1
 4.74727507E+00-4.88581697E-04 2.68444865E-07-2.43476072E-11-1.03683156E-15    2
-1.51101862E+03-3.44538559E-01 2.73638114E+00 7.83525699E-03-1.45104963E-05    3
 1.25730834E-08-4.13247143E-12-1.05880114E+03 9.44557148E+00 0.00000000E+00    4
NE REF ELEMENT    L10/90NE  100  000  000  0G   200.000  6000.000              1
 0.25000000E 01 0.00000000E 00 0.00000000E 00 0.00000000E 00 0.00000000E 00    2
-0.74537500E 03 0.33553227E 01 0.25000000E 01 0.00000000E 00 0.00000000E 00    3
 0.00000000E 00 0.00000000E 00-0.74537498E 03 0.33553227E 01 0.00000000E+00    4
S84       graphit G09/04C  84   0.   0.   0.G   200.000  6000.000              1
 1.22278162E+02 1.44233362E-01-5.85970631E-05 1.13637854E-08-8.12825230E-13    2
-5.83907563E+04-7.16157486E+02-2.61132545E+01 3.69897081E-01 1.59931062E-04    3
-5.36379437E-07 2.51129979E-10-9.12666614E+03 9.35616775E+01                   4
END6FTHERMO
